## Eliminating accidental deviations to minimize generalization error and maximize reliability: applications in connectomics and genomics

Eric W. Bridgeford<sup>1</sup>, Shangsi Wang<sup>1</sup>, Zhi Yang<sup>2</sup>, Zeyi Wang<sup>1</sup>, Ting Xu<sup>3</sup>, Cameron Craddock<sup>3</sup>, Jayanta Dey<sup>1</sup>, Gregory Kiar<sup>1</sup>, William Gray-Roncal<sup>1</sup>, Carlo Colantuoni<sup>1</sup>, Christopher Douville<sup>1</sup>, Stephanie Noble<sup>4</sup>, Carey E. Priebe<sup>1</sup>, Brian Caffo<sup>1</sup>, Michael Milham<sup>3</sup>, Xi-Nian Zuo<sup>2,5</sup>, Consortium for Reliability and Reproducibility, Joshua T. Vogelstein<sup>1,5†\*</sup>

**Abstract.** Reproducibility, the ability to replicate scientific findings, is a prerequisite for scientific discovery and clinical utility. Troublingly, we are in the midst of a reproducibility crisis. A key to reproducibility is that multiple measurements of the same item (e.g., experimental sample or clinical participant) under fixed experimental constraints are relatively similar to one another. Thus, statistics that quantify the relative contributions of accidental deviations—such as measurement error—as compared to systematic deviations—such as individual differences—are critical. We demonstrate that existing reproducibility statistics, such as intra-class correlation coefficient and fingerprinting, fail to adequately differentiate between accidental and systematic deviations in very simple settings. We therefore propose a novel statistic, *discriminability*, which quantifies the degree to which an individual's samples are relatively similar to one another, without restricting the data to be univariate, Gaussian, or even Euclidean. Using this statistic, we introduce the possibility of optimizing experimental design via increasing discriminability and prove that optimizing discriminability improves performance bounds in subsequent inference tasks. In extensive simulated and real datasets (focusing on brain imaging and demonstrating on genomics), only optimizing data *discriminability* improves performance on all subsequent inference tasks for each dataset. We therefore suggest that designing experiments and analyses to optimize discriminability may be a crucial step in solving the reproducibility crisis, and more generally, mitigating accidental measurement error.

**1 Introduction** Understanding variability, and the sources thereof, is fundamental to all of data science. Even the first papers on modern statistical methods concerned themselves with distinguishing accidental from systematic variability [1]. Accidental deviations correspond to sources of variance that are not of scientific interest, including measurement noise and artifacts from the particular experiment (often called “batch effects” [2]). Quantifying systematic deviations of the variables of interest, such as variance across items within a study, is often the actual goal of the study. Thus, delineating between these two sources of noise is a central quest in data science, and failure to do so, has been problematic in modern science [3].

Scientific reproducibility, repeatability, and reliability are key in data science, whether applied to basic discovery or clinical utility [4]. As a rule, if results do not reproduce, we can not justifiably trust them. The concept of reproducibility is closely related to the statistical concepts of stability [5] and robustness [4]. Engineering and operations research have been concerned with *reliability* for a long time, as they require that their products are reliable under various conditions. Very recently, the general research community became interested in these issues, as individuals began noticing and publishing failures to reproduce across fields, including neuroscience and psychology [6–8].

A number of strategies have been suggested to resolve this “reproducibility crisis.” For example, the editors of “Basic and Applied Social Psychology” have banned the use of p-values [9]. Unfortunately, an analysis of the publications since banning indicates that studies after the ban tended to overstate, rather than understate, their claims, suggesting that this proposal possibly had the opposite effect [10]. More recently, the American Statistical Association released a statement recommending banning the phrase “statistically significant” for similar reasons [11, 12].

A different strategy has been to quantify the reproducibility, or reliability, of ones' data by measuring each sample (or individual) multiple times. Such test-retest reliability experiments quantify the relative

\* <sup>1</sup> Johns Hopkins University, <sup>2</sup> Shanghai Jiaotong University, <sup>3</sup> Child Mind Institute, <sup>4</sup> Yale University, <sup>5</sup> Beijing Normal University, Nanning Normal University, University of Chinese Academy of Sciences, <sup>5</sup> Progressive Learning. † Corresponding author: Joshua T. Vogelstein ([jovo@jhu.edu](mailto:jovo@jhu.edu)).

similarity of multiple measurements of the same item, as compared to different items [13]. This practice has been particularly popular in brain imaging, where many studies have been devoted to quantifying the reproducibility of different univariate properties of the data [14–17]. In practice, however, these approaches have severe limitations. The Intraclass Correlation Coefficient (ICC) is an approach that quantifies the ratio of within item variance to across item variance. The ICC is univariate, with limited applicability to high-dimensional data, and its interpretation suffers from limitations due to its motivating Gaussian assumptions. Previously proposed generalizations of ICC, such as the Image Intraclass Correlation Coefficient (I2C2), generalize ICC to multivariate data, but require large sample sizes to estimate high-dimensional covariance matrices. Further, motivating intuition of I2C2 makes similar Gaussian parametric assumptions as ICC, and therefore exhibits similar limitations. The Fingerprinting Index (Fingerprint) provides a nonparametric and multivariate technique for quantifying test-retest reliability, but its greedy assignment leads it to provide counter-intuitive results in certain contexts. A thorough discussion and analysis of these and similar is provided in Appendix A.

Perhaps the most problematic aspect of these approaches is clear from the popular adage, “garbage in, garbage out” [18]. If the measurements themselves are not sufficiently reproducible, then scalar summaries of the data cannot be reproducible either. This primacy of measurement is fundamental in statistics, so much so that one of the first modern statistics textbook, R.A. Fisher’s, “The Design of Experiments” [19], is focused on taking measurements. Motivated by Fisher’s work on experimental design, and Spearman’s work on measurement, rather than recommending different post-data acquisition inferential techniques, or computing the reproducibility of data after collecting, we take a different approach. Specifically, **we advocate for explicitly and specifically designing experiments to ensure that they provide highly reproducible data, rather than hoping that they do and performing post-hoc checks after collecting the data.** Experimental design has a rich history, including in psychology [20] and neuroscience [21, 22]. The vast majority of work in experimental design, however, focuses on designing an experiment to answer a particular scientific question. In this big data age, experiments are often designed to answer many questions, including questions not even considered at the time of data acquisition. How can one even conceivably design experiments to obtain data that is particularly useful for those questions?

Specifically, we propose to design experiments to optimize the *inter-item discriminability* of individual items (for example, participants in a study, or samples in an experiment). This idea is closely inspired by and related to ideas proposed by Cronbach’s “Theory of Generalizability” [23, 24]. To do so, we leverage our recently introduced *Discr* statistic [25]. *Discr* quantifies the degree to which multiple measurements of the same item are more similar to one another than they are to other items [26], essentially capturing the desiderata of Spearman from over 100 years ago. This statistic has several advantages over existing statistics that one could potentially use to optimize experimental design. First, it is nonparametric, meaning that its validity and interpretation do not depend on any parametric assumptions, such as Gaussianity. Second, it can readily be applied to multivariate Euclidean data, or even non-Euclidean data (such as images, text, speech, or networks). Third, it can be applied to any stage of the data science pipeline, from data acquisition to data wrangling to data inferences. Finally, and most uniquely, one of the main advantages of ICC, is that under certain assumptions, ICC can provide an upper bound on predictive accuracy for any subsequent inference task. Specifically, we present here a result generalizing ICC’s bound on predictive accuracy to multivariate settings. Thus, *Discr* is the *only* non-parametric multivariate measure of test-retest reliability with formal theoretical guarantees of convergence and upper bounds on subsequent inference performance.

An important clarification is that high test-retest reliability does not provide any information about the extent to which a measurement coincides with what it is purportedly measuring (construct validity). Even though reproducible data are not enough on their own, reproducible data are required for stable subsequent inferences.

This manuscript provides the following contributions:

1. Demonstrates that `Discr` adequately quantifies the relative contribution of various accidental and systematic deviations, where previously proposed statistics fail.
2. Formalizes hypothesis tests to assess discriminability of a dataset, and whether one dataset or approach is more discriminable than another. This is in contrast to previously proposed non-parametric approaches to quantify test-retest reliability, that merely provide a test statistic, but no valid test per se.
3. Provides sufficient conditions for `Discr` to provide a lower bound on predictive accuracy. `Discr` is the *only* multivariate measure of reliability that has been explicitly related to criterion validity, both parametric and non-parametric.
4. Illustrates on 28 neuroimaging datasets from Consortium for Reliability and Reproducibility (CoRR) [27] and 2 genomics datasets which preprocessing pipelines maximize `Discr`, and demonstrate that maximizing `Discr` is significantly associated with maximizing the amount of information about multiple covariates, in contrast to other related statistics.
5. Replicates the above on multiple ultrahigh-dimensional genomics datasets.
6. Provides all source code and data derivatives open access at <https://neurodata.io/mgc>.

## 2 Methods

**2.1 The inter-item discriminability statistic** Testing for inter-item discriminability is closely related to, but distinct from, k-sample testing. In k-sample testing we observe k groups, and we want to determine whether they are different *at all*. In inter-item discriminability, the k groups are in fact k different items (or individuals), and we care about whether replicates within each of the k groups are close to each other, which is a specific kind of difference. As a general rule, if one can specify the kind of difference one is looking for, then tests can have more power for that particular kind of difference. The canonical example of this would be an t-test, where if only looks at whether the means are different across the groups, one obtains higher power than if also looking for differences in variances.

To give a concrete example, assume one item has replicates on a circle with radius one, with random angles. Consider another item whose replicates live on another circle, concentric with the first, but with a different radius. The two items differ, and many nonparametric two-sample tests would indicate so (because one can perfectly identify the item by the radius of the sample). However, the discriminability in this example is not one, because there are samples of either item that are further from other samples of that item than samples from the other item.

On this basis, we developed our inter-item discriminability test statistic (`Discr`), which is inspired by, and builds upon, nonparametric two-sample and k-sample testing approaches called “Energy statistics” [28] and “Kernel mean embeddings” [29] (which are equivalent [30]). These approaches compute all pairwise similarities (or distances) and operate on them. `Discr` differs from these methods in two key ways. First, rather than operating on the magnitudes of all the pairwise distances directly, `Discr` operates on the ranks of the distances, rendering it robust to monotonic transformations of the data [31]. Second, `Discr` only considers comparisons of the ranks of pairwise distances between different items with the ranks of pairwise distances between the same item. All other information is literally discarded, as it does not provide insight into the question of interest.

Figure 1 shows three different simulations illustrating the differences between `Discr` and other reliability statistics, including the fingerprinting index (`Fingerprint`) [32], intraclass correlation coefficient (ICC) [33], and `Kernel` [29] (see Appendix A for details). All four statistics operate on the pairwise distance matrices in column (B). However, `Discr`, unlike the other statistics, only considers the elements of each row whose magnitudes are smaller than the distances within an item. Thus, `Discr` explicitly quantifies the degree to which multiple measurements of the same item are more similar to one another than they are to other items.

**Definition 1 (Inter-Item Discriminability).** Assuming we have  $n$  items, where each item has  $s_i$

measurements, we obtain  $N = \sum_i^n i \times s_i$  total measurements. For simplicity, assume  $s_i = 2$  for the below definition, and that there are no ties. Given that,  $Discr$  can be computed as follows (for a more formal definition and pseudocode, please see Appendix B):

1. Compute the distance between all pairs of samples (resulting in an  $N \times N$  matrix), Figure 1(B). While any measure of distance is permissible, for the purposes of this manuscript, we perform all our experiments using the Euclidean distance.
2. Identify replicated measurements of the same individual (green boxes). The number of green boxes is  $g = n \times 2$ .
3. For each measurement, identify measurements that are more similar to it than the other measurement of the same item, i.e., measurements whose magnitude is smaller than that in the green box (orange boxes). Let  $f$  be the number of orange boxes.
4. Discriminability is defined as fraction of times across-subject measurements are smaller than within-subject measurements:  $Discr = 1 - \frac{f}{N(N-1)-g}$ .

A high  $Discr$  indicates that within-item measurements tend to be more similar to one another than across-item measurements. See Wang et al. [34] for a theoretical analysis of  $Discr$  as compared to these and other data reliability statistics. For brevity, we use the term “discriminability” to refer to inter-item discriminability hereafter.

**2.2 Testing for discriminability** Letting  $R$  denote the reliability of a dataset with  $n$  items and  $s$  measurements per item, and  $R_0$  denote the reliability of the same size dataset with zero item specific information, test for reliability is

$$H_0 : R = R_0, \quad H_A : R > R_0.$$

One can use any ‘data reliability’ statistic for  $R$  and  $R_0$  [34]. We devised a permutation test to obtain a distribution of the test statistic under the null, and a corresponding p-value. To evaluate the different procedures, we compute the power of each test, that is, the probability of correctly rejecting the null when it is false (which is one minus type II error; see Appendix E.1 for details).

**2.3 Testing for better discriminability** Letting  $R^{(1)}$  be the reliability of one dataset or approach, and  $R^{(2)}$  be the reliability of the second, we have the following comparison hypothesis for reliability:

$$H_0 : R^{(1)} = R^{(2)}, \quad H_A : R^{(1)} > R^{(2)}.$$

Again, we devised a permutation test to obtain the distribution of the test statistic under the null, and p-values (see Appendix E.2 for details).

**2.4 Simulation settings** To develop insight into the performance of  $Discr$ , we consider several different simulation settings (see Appendix D for details). Each setting includes between 2 and 20 items, with 128 total measurements, in two dimensions:

1. **Gaussian** Sixteen items are each distributed according to a spherically symmetric Gaussian, therefore respecting the assumptions that motivate intraclass correlations.
2. **Cross** Two items have Gaussian distributions with the same mean and different diagonal covariance matrices.
3. **Ball/Circle** One item is distributed in the unit ball, the other on the unit circle; Gaussian noise is added to both.
4. **XOR** Each of two items is a mixture of two spherically symmetric Gaussians, but means are organized in an XOR fashion; that is, the means of the first item are  $(0, 1)$  and  $(1, 0)$ , whereas the means of the second are  $(0, 0)$  and  $(1, 1)$ . The implication is that many measurements from a given item are further away than any measurement of the other item.
5. **No Signal** Both items have the same Gaussian distribution.

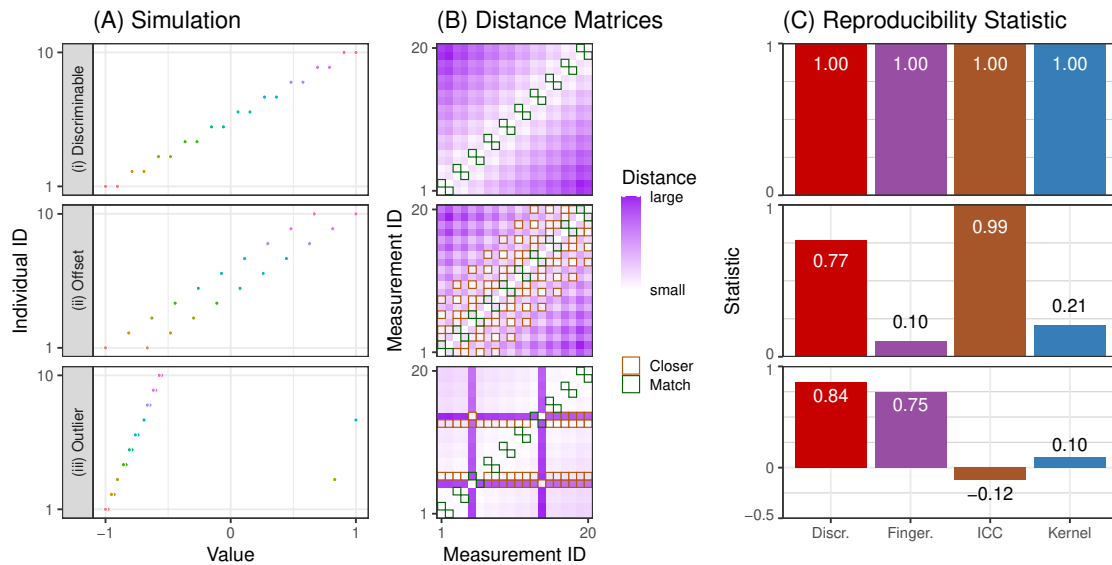

Figure 1: **Discr provides a valid discriminability statistic.** Three simulations with characteristic notions of discriminability are constructed with  $n = 10$  items each with  $s = 2$  measurements. **(A)** The 20 samples, where color indicates the individual associated with a single measurement. **(B)** The distance matrices between pairs of measurements. Samples are organized by item. For each row (measurement), green boxes indicate measurements of the same item, and an orange box indicates a measurement from a different item that is more similar to the measurement than the corresponding measurement from the same item. **(C)** Comparison of four reproducibility statistics in each simulation. Row (i): Each item is most similar to a repeated measurement from the same item. All discriminability statistics are high. Row (ii): Measurements from the same item are more similar than measurements from different individuals on average, but each item has a measurement from a different item in between. ICC is essentially unchanged from (i) despite the fact that observations from the same individual are less similar than they were in (i), and both Fingerprint and Kernel are reduced by about an order of magnitude relative to simulation (i). Row (iii): Two of the ten individuals have an “outlier” measurement, and the simulation is otherwise identical to (i). ICC is negative, and Kernel provides a small statistic. Discr is the only statistic that is robust and valid across all of these simulated examples.

### 3 Results

**3.1 Theoretical properties of Discriminability** Under reasonably general assumptions, if within-item variability increases, predictive accuracy will decrease. Therefore, a statistic that is sensitive to within-item variance is desirable for optimal experimental design, regardless of the distribution of the data. Carmines and Zeller [35] introduces a univariate parametric framework in which predictive accuracy can be lower-bounded by a decreasing function of ICC; as a direct consequence, a strategy with a higher ICC will, on average, have higher predictive performance on subsequent inference tasks. Unfortunately, this valuable theoretical result is limited in its applicability, as it is restricted to univariate data, whereas big data analysis strategies often produce multivariate data. We therefore prove the following generalization of this theorem:

**Theorem 1.** *Under the multivariate Gaussian mixture model plus additive Gaussian noise setting, Discr provides a lower bound on the predictive accuracy of a subsequent classification task. Consequently, a strategy with a higher Discr provably provides a higher bound on predictive accuracy than a strategy with a lower Discr.*

See Appendix C for proof. Correspondingly, this property motivates optimizing experiments to obtain higher Discr.



**3.2 Properties of various reliability statistics** In Figure 1, we highlight the properties of different statistics across a range of basic one-dimensional simulations, all of which display a characteristic notion of reproducibility: samples of the same item tend to be more similar to one another than samples from different items. In three different univariate simulations we observe two samples from ten items (Figure 1A), and the construct in which reliability statistics will be evaluated:

- (i) **Discriminable** has each item's samples closer to each other than any other items. The reliability statistic should attain a large value to reflect the high within-item similarity compared to the between-item similarity.
- (ii) **Offset** shifts the second measurement a bit, so that it is further from the first measurement than another item. Reliability statistic should still be high, but lower than the offset simulation.
- (iii) **Outlier** is the same as **discriminable** but includes two items with an outlier measurement. This is another highly reliable setting, so we hope outliers do not significantly reduce the reliability score.

We compare `Discr` to intraclass correlation coefficient (ICC), fingerprinting index (`Fingerprint`) [32], and k-sample kernel testing (`Kernel`) [36] (see Appendix A for details). ICC provides no ability for differentiating between *discriminable* and *offset* simulation, despite the fact that the data in *discriminable* is more reproducible than *offset*. While this property may be useful in some contexts, a lack of sensitivity to the offset renders users unable to discern which strategy has a higher test-retest reliability. Moreover, ICC is uninterpretable in the case of even a very small number of outliers, where ICC is negative. On the other hand, `Fingerprint` suffers from the limitation that if the nearest measurement is anything but a measurement of the same item, it will be at or near zero, as shown in *offset*. `Kernel` also performs poorly in *offset* and in the presence of *outliers*. In contrast, across all simulations, `Discr` shows reasonable construct validity under the given constructs: the statistic is high across all simulations, and highest when repeated measurements of the same item are more similar than measurements from any of the other items.

**3.3 The power of reliability statistics in multivariate experimental design** We evaluate `Discr`, `PICC` (which applies ICC to the top principal component of the data), `I2C2`, `Fingerprint`, and `Kernel` on five two-dimensional simulation settings (see Appendix A for details). Figure 2A shows a two-dimensional scatterplot of each setting, and Figure 2B shows the Euclidean distance matrix between samples, ordered by item.

**Discriminability empirically predicts performance on subsequent inference tasks** Figure 2C shows the impact of increasing within-item variance on the different simulation settings. For the top four simulations, increasing variance decreases predictive accuracy (green line). As desired, `Discr` also decreases nearly perfectly monotonically with decreasing variances. However, only in the first setting, where each item has a spherically symmetric Gaussian distribution, do `I2C2`, `PICC`, and `Fingerprint` drop proportionally. Even in the second (Gaussian) setting, `I2C2`, `PICC`, and `Fingerprint` are effectively uninformative about the within-item variance. And in the third and fourth (non-Gaussian) settings, they are similarly useless. In the fifth simulation they are all at chance levels, as they should be, because there is no information about class in the data. This suggests that of these statistics, only `Discr` and `Kernel` can serve as satisfactory surrogates for predictive accuracy under these quite simple settings.

**A test to determine reliability** A prerequisite for making item-specific predictions is that items are different from one another in predictable ways, that is, are discriminable. If not, the same assay applied to the same individual on multiple trials could yield in unacceptably highly variable results. Thus, prior to embarking on a machine learning search for predictive accuracy, one can simply test whether the data are discriminable at all. If not, predictive accuracy will be hopeless.

Figure 2D shows that `Discr` achieves approximately the highest power among all competing ap-

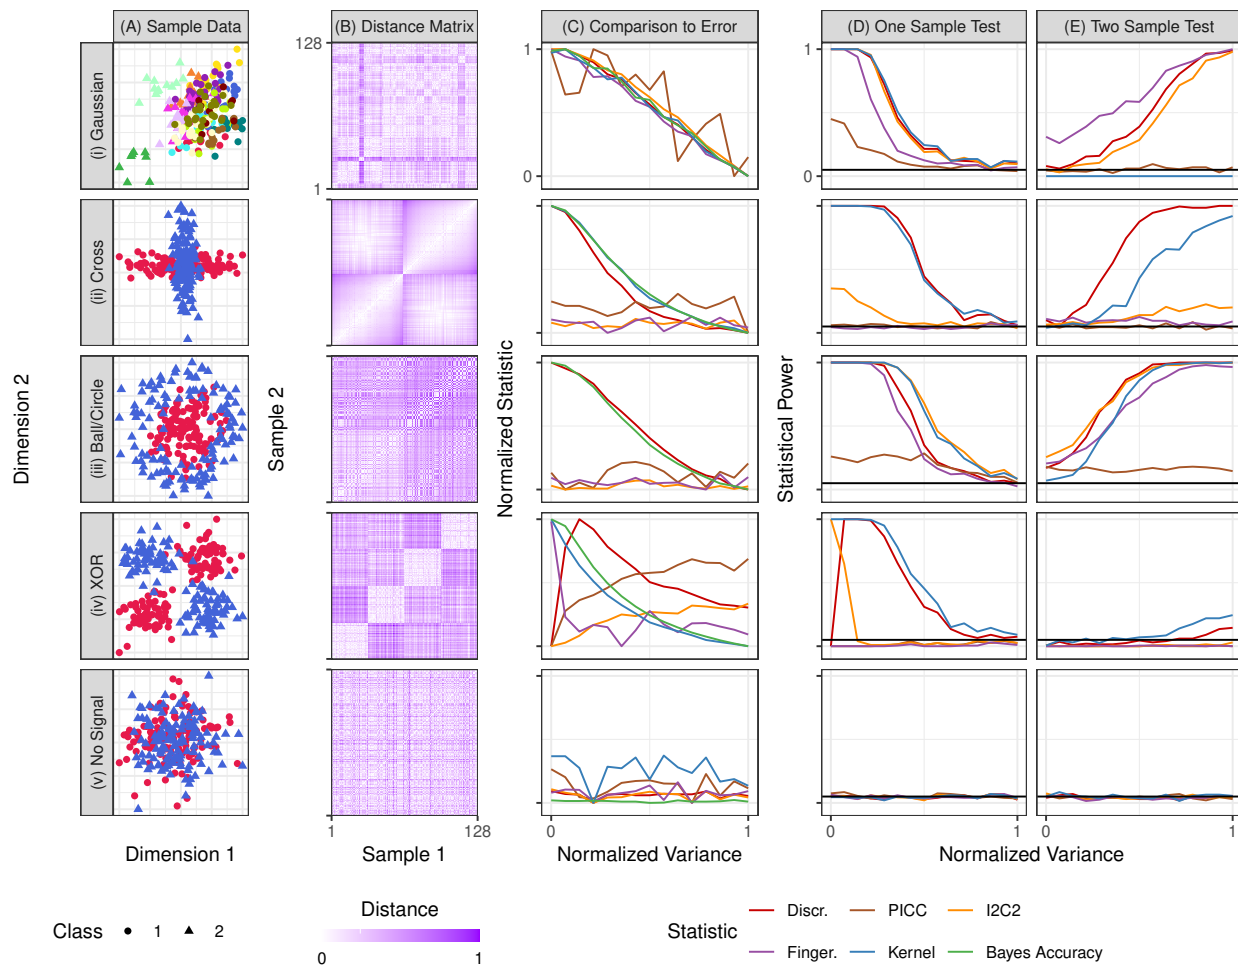

Figure 2: **Multivariate simulations demonstrate the value of optimizing reliability for experimental design.** All simulations are two-dimensional, with 128 samples, with 500 iterations per setting (see Appendix D for details). **(A)** For each setting, class label is indicated by shape, and color indicates item identity. **(B)** Euclidean distance matrix between samples within each simulation setting. Samples are organized by item. Simulation settings in which items are discriminable tend to have a block structure where samples from the same item are relatively similar to one another. **(C)** Reproducibility statistic versus variance. Here, we can compute the Bayes accuracy (the best one could perform to predict class label) as a function of variance. *Discr* and *Kernel* are mostly monotonic relative to within-item variance across all settings, suggesting that one can predict improved performance via improved *Discr*. **(D)** Test of whether data are discriminable. *Discr* typically achieves highest power among the alternative statistics in all cases. **(E)** Comparison test of which approach is more discriminable. *Discr* typically achieves highest power for all settings and variances.

proaches in all settings and variances. This result demonstrates that despite the fact that *Discr* does not rely on Gaussian assumptions, it still performs as well or better than parametric methods when the data satisfy these assumptions (row (i)). In row (ii) cross, only *Discr* and *Kernel* correctly identify that items differ from one another, despite the fact that the data are Gaussian, though they are not spherically symmetric Gaussians. In both rows (iii) ball/disc and (iv) XOR, most statistics perform well despite the non-Gaussianity of the data. And when there is no signal, all tests are valid, achieving power less than or equal to the critical value. Non-parametric *Discr* therefore has the power of parametric approaches for data at which those assumptions are appropriate, and much higher power for other data. *Kernel* performs comparably to *Discr* in these settings, though with somewhat less power in

row (iv) XOR.

**A test to compare reliabilities** Given two experimental designs—which can differ either by acquisition and/or analysis details—are the measurements produced by one method more discriminable than the other? Figure 2D shows *Discr* typically achieves the highest power among all statistics considered. Specifically, only *Fingerprint* achieves higher power in the Gaussian setting, but it achieves almost no power in the cross setting. *Kernel* achieves extremely low power for all settings, as does *PICC*. *I2C2* achieves similar power to *Discr* only for the Gaussian and ball/disc setting. All tests are valid in that they achieve a power approximately equal to or below the critical value when there is no signal. Note that these comparisons are not the typical “k-sample comparisons” with many theoretical results, rather, they are comparing across multiple disparate k-sample settings. Thus, in general, there is a lack of theoretical guarantees for this setting. Nonetheless, the fact that *Discr* achieves nearly equal or higher power than the statistics that build upon Gaussian methods, even under Gaussian assumptions, suggests that *Discr* will be a superior metric for optimal experimental design in real data.

### 3.4 Optimizing experimental design via maximizing reliability in human brain imaging data

**Human brain imaging data acquisition and analysis** Consortium for Reliability and Reproducibility (CoRR) [37] has generated functional, anatomical, and diffusion magnetic resonance imaging (dMRI) scans from >1,600 participants, often with multiple measurements, collected through 28 different studies (22 of which have both age and sex annotation) spanning over 20 sites. Each of the sites use different scanners, technicians, and scanning protocols, thereby representing a wide variety of different acquisition settings with which one can test different analysis pipelines. Figure 3A shows the six stage sequence of analysis steps for converting the raw fMRI data into networks or connectomes, that is, estimates of the strength of connections between all pairs of brain regions. At each stage of the pipeline, we consider several different “standard” approaches, that is, approaches that have previously been proposed in the literature, typically with hundreds or thousands of citations [38]. Moreover, they have all been collected into an analysis engine, called Configurable Pipeline for the Analysis of Connectomes (C-PAC) [39]. In total, for the six stages together, we consider  $2 \times 2 \times 2 \times 2 \times 4 \times 3 = 192$  different analysis pipelines. Because each stage is nonlinear, it is possible that the best sequence of choices is not equivalent to the best choices on their own. For this reason, publications that evaluate a given stage using any metric, could result in misleading conclusions if one is searching for the best sequence of steps. The dMRI connectomes were acquired via 48 analysis pipelines using the Neurodata MRI Graphs (*ndmg*) pipeline [40]. Appendix F provides specific details for both fMRI and dMRI analysis, as well as the options attempted.

**Different analysis strategies yield widely disparate stabilities** The analysis strategy has a large impact on the *Discr* of the resulting fMRI connectomes (Figure 3B). Each column shows one of 64 different analysis strategies, ordered by how significantly different they are from the pipeline with highest *Discr* (averaged over all datasets, tested using the above comparison test). Interestingly, pipelines with worse average *Discr* also tend to have higher variance across datasets. The best pipeline, FNNNCP, uses FSL registration, no frequency filtering, no scrubbing, no global signal regression, CC200 parcellation, and converts edges weights to ranks. While all strategies across all datasets with multiple participants are significantly discriminable at  $\alpha = 0.05$  (*Discr* goodness of fit test), the majority of the strategies ( $51/64 \approx 80\%$ ) show significantly worse *Discr* than the optimal strategy at  $\alpha = 0.05$  (*Discr* comparison test).

**Discriminability identifies which acquisition and analysis decisions are most important for improving performance** While the above analysis provides evidence for which *sequence* of analysis steps is best, it does not provide information about which choices individually have the largest impact on overall *Discr*. To do so, it is inadequate to simply fix a pipeline and only swap out algorithms for a single stage, as such an analysis will only provide information about that fixed pipeline. Therefore, we evaluate



(A) Processing Strategies Evaluated

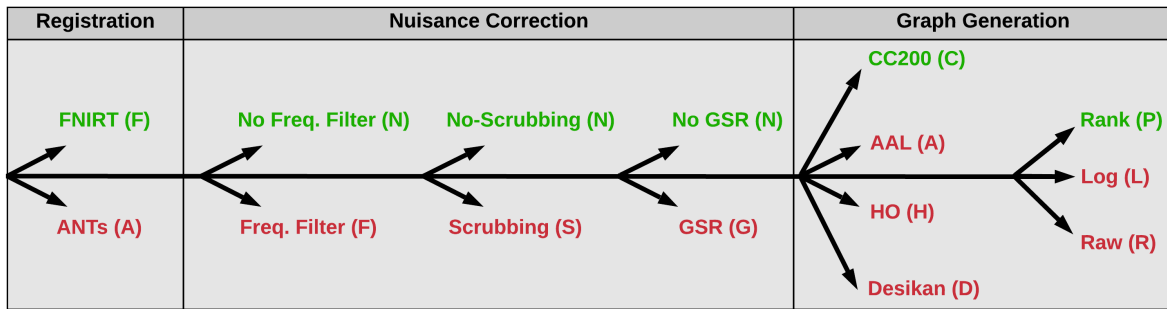

(B) Comparing Discriminability Across 64 Preprocessing Strategies

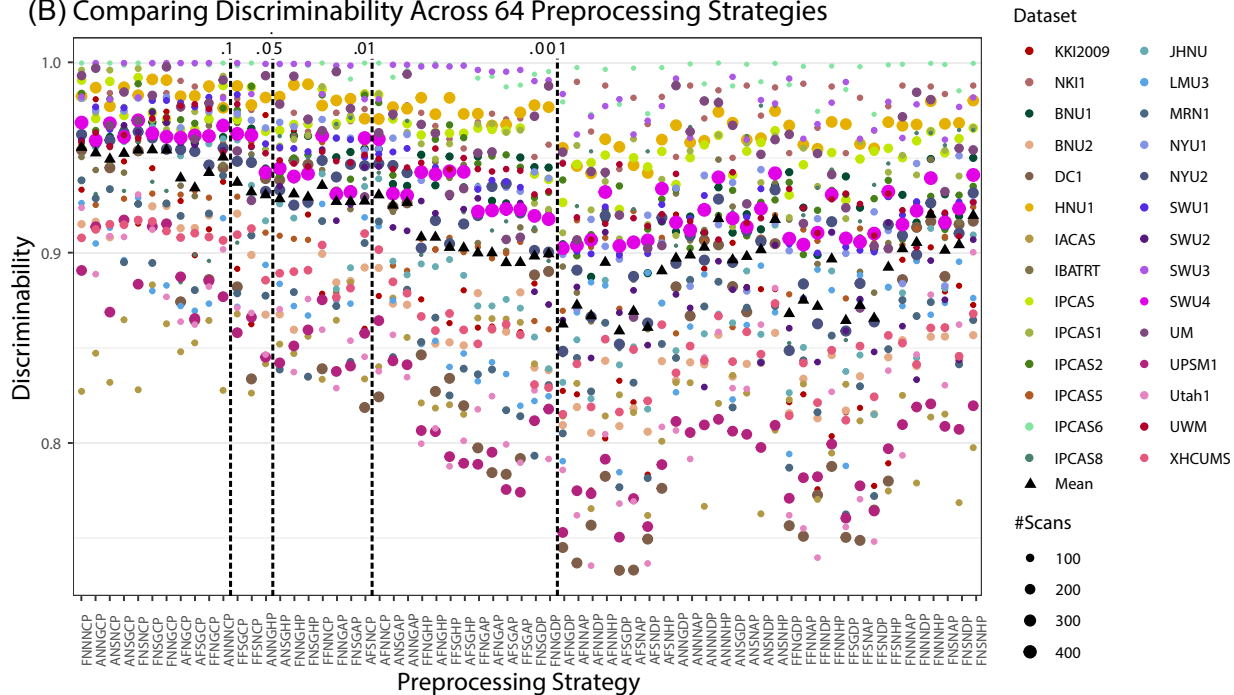

Figure 3: **Different analysis strategies yield widely disparate stabilities.** (A) Illustration of analysis options for the 192 fMRI pipelines under consideration (described in Appendix F). The sequence of options corresponding to the best performing pipeline overall are in green. (B)  $Discr$  of fMRI Connectomes analyzed using 64 different pipelines. Functional correlation matrices are estimated from 28 multi-session studies from the CoRR dataset using each pipeline. The analysis strategy codes are assigned sequentially according to the abbreviations listed for each step in (A). The mean  $Discr$  per pipeline is a weighted sum of its stabilities across datasets. Each pipeline is compared to the optimal pipeline with the highest mean  $Discr$ , FNNNCP, using the above comparison hypothesis test. The remaining strategies are arranged according to  $p$ -value, indicated in the top row.

each choice in the context of all 192 considered pipelines in Figure 4A. The pipeline constructed by identifying the best option for each analysis stage is FNNGCP (Figure 4A). Although it is not exactly the same as the pipeline with highest  $Discr$  (FNNNCP), it is also not much worse ( $Discr$  2-sample test,  $p$ -value  $\approx 0.14$ ). Moreover, except for scrubbing, each stage has a significant impact on  $Discr$  after correction for multiple hypotheses (Wilcoxon signed-rank statistic,  $p$ -values all  $< 0.001$ ).

Another choice is whether to estimate connectomes using functional or diffusion MRI (Figure 4B). Whereas both data acquisition strategies have known problems [41], the  $Discr$  of the two experimental modalities has not been directly compared. Using four datasets from CoRR that acquired both fMRI and dMRI on the same subjects, and have quite similar demographic profiles, we tested whether

fMRI or dMRI derived connectomes were more discriminable. The pipelines being considered were the best-performing fMRI pre-processing pipeline (FNNNCP) against the dMRI pipeline with the CC200 parcellation. For three of the four datasets, dMRI connectomes were more discriminable. This is not particularly surprising, given the susceptibility of fMRI data to changes in state rather than trait (e.g., amount of caffeine prior to scan [39]).

The above results motivate investigating which aspects of the dMRI analysis strategy were most effective. We focus on two criteria: how to scale the weights of connections, and how many regions of interest (ROIs) to use. For scaling the weights of the connections, we consider three possible criteria: using the raw edge-weights (“Raw”), taking the log of the edge-weights (“Log”), and ranking the non-zero edge weights in sequentially increasing order (“Rank”). Figure 4C.i shows that both rank and log transform significantly exceed raw edge weights (Wilcoxon signed-rank statistic, sample size= 60, p-values all < 0.001). Figure 4C.ii shows that parcellations with larger numbers of ROIs tend to have higher *Discr*. Unfortunately, most parcellations with semantic labels (e.g., visual cortex) have hundreds not thousands of parcels. This result therefore motivates the development of more refined semantic labels.

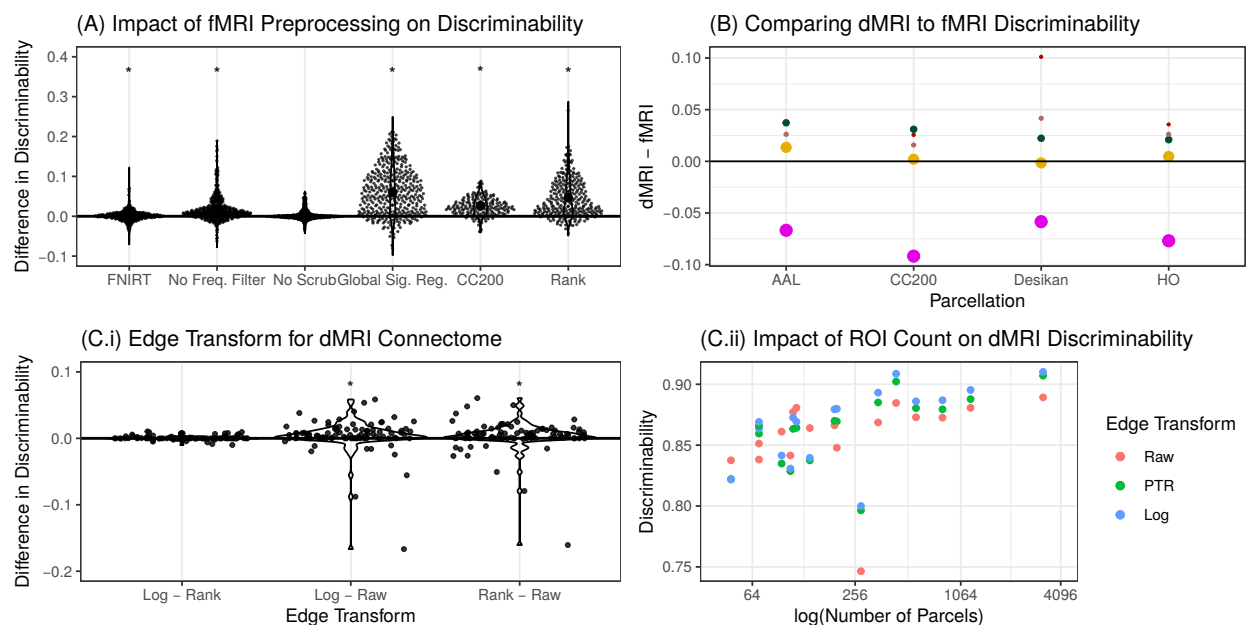

**Figure 4: Parsing the relative impact on *Discr* of various acquisition and analytic choices.** (A) The pipelines are aggregated for a particular analysis step, with pairwise comparisons with the remaining analysis options held fixed. The beeswarm plot shows the difference between the overall best performing option and the second best option for each stage (mean in bigger black dot); the *x*-axis label indicates the best performing strategy. The best strategies are FNIRT, no frequency filtering, no scrubbing, global signal regression, the CC200 parcellation, and ranks edge transformation. A Wilcoxon signed-rank test is used to determine whether the mean for the best strategy exceeds the second best strategy: a \* indicates that the *p*-value is at most 0.001 after Bonferroni correction. Of the best options, only no scrubbing is *not* significantly better than alternative strategies. Note that the options that perform marginally the best are not significantly different than the best performing strategy overall, as shown in Figure 3. (B) A comparison of the stabilities for the 4 datasets with both fMRI and dMRI connectomes. dMRI connectomes tend to be more discriminable, in 14 of 20 total comparisons. (C.i) Comparing raw edge weights (Raw), ranking (Rank), and log-transforming the edge-weights (Log) for the diffusion connectomes, the Log and Rank transformed edge-weights tend to show higher *Discr* than Raw. (C.ii) As the number of ROIs increases, the *Discr* tends to increase.

**Optimizing Discriminability improves downstream inference performance** We next examined the relationship between the `Discr` of each pipeline, and the amount of information it preserves about two properties of interest: sex and age. Based on the simulations above, we expect that analysis pipelines with higher `Discr` will yield connectomes with more information about covariates. Indeed, Figure 5 shows that, for virtually every single dataset including sex and age annotation (22 in total), a pipeline with higher `Discr` tends to preserve more information about both covariates. The amount of information is quantified by the effect size of the distance correlation `DCorr` (which is exactly equivalent to `Kernel` [31, 42]), a statistic that quantifies the magnitude of association for both linear and nonlinear dependence structures. In contrast, if one were to use either `Kernel` or `I2C2` to select the optimal pipeline, for many datasets, subsequent predictive performance would degrade. `Fingerprint` performs similarly to `Discr`, while `PICC` provides a slight decrease in performance on this dataset. These results are highly statistically significant: the slopes of effect size versus `Discr` and `Fingerprint` across datasets are significantly positive for both age and sex in 82 and 95 percent of all studies, respectively (robust  $Z$ -test,  $\alpha = 0.05$ ). `Kernel` performs poorly, basically always, because  $k$ -sample tests are designed to perform well with many samples from a small number of different populations, and questions of reproducibility across repeated measurements have a few samples across many different populations.

**3.5 Reliability of genomics data** The first genomics study aimed to explore variation in gene expression across human induced pluripotent stem cell (hiPSC) lines with between one and seven replicates [43]. This data includes RNAseq data from 101 healthy individuals, comprising 38 males and 63 females. Expression was interrogated across donors by studying up to seven replicated iPSC lines from each donor, yielding bulk RNAseq data from a total of 317 individual hiPSC lines. While the pipeline includes many steps, we focus here for simplicity on (1) counting, and (2) normalizing. The two counting approaches we study are the raw hiPSC lines and the count-per-million (CPM). Given counts, we consider four different normalization options: Raw, Rank, and Log-transformed (as described above), as well as to mean-centering (normalizing each sample to have an average count of 0). The task of interest was to identify the sex of the individual.

The second genomics study [44] includes 331 individuals, consisting of 135 patients with non-metastatic cancer and 196 healthy controls, each with eight DNA samples. The study leverages a PCR-based assay called Repetitive element aneuploidy sequencing system to analyze  $\sim 750,000$  amplicons distributed throughout the genome to investigate the presence of aneuploidy (abnormal chromosome counts) in samples from cancer patients (see Appendix F.1 for more details). The possible processing strategies include using the raw amplicons or the amplicons downsampled by a factor of  $5 \times 10^4$  bases,  $5 \times 10^5$  bases,  $5 \times 10^6$  bases, or to the individual chromosome level (the *resolution* of the data), followed by normalizing through the previously described approaches (Raw, Rank, Log-transformed) yielding  $5 \times 3 = 15$  possible strategies in total. The task of interest was to identify whether the sample was collected from a cancer patient or a healthy control.

Across both tasks, slope for discriminability is positive, and for the first task, the slope is significantly bigger than zero (robust  $Z$ -test,  $p$ -value = .001,  $\alpha = .05$ ). `Fingerprint` and `Kernel` are similarly only informative for one of the two genomics studies. For `PICC`, in both datasets the slope is positive and the effect is significant. `I2C2` does not provide value for subsequent inference.

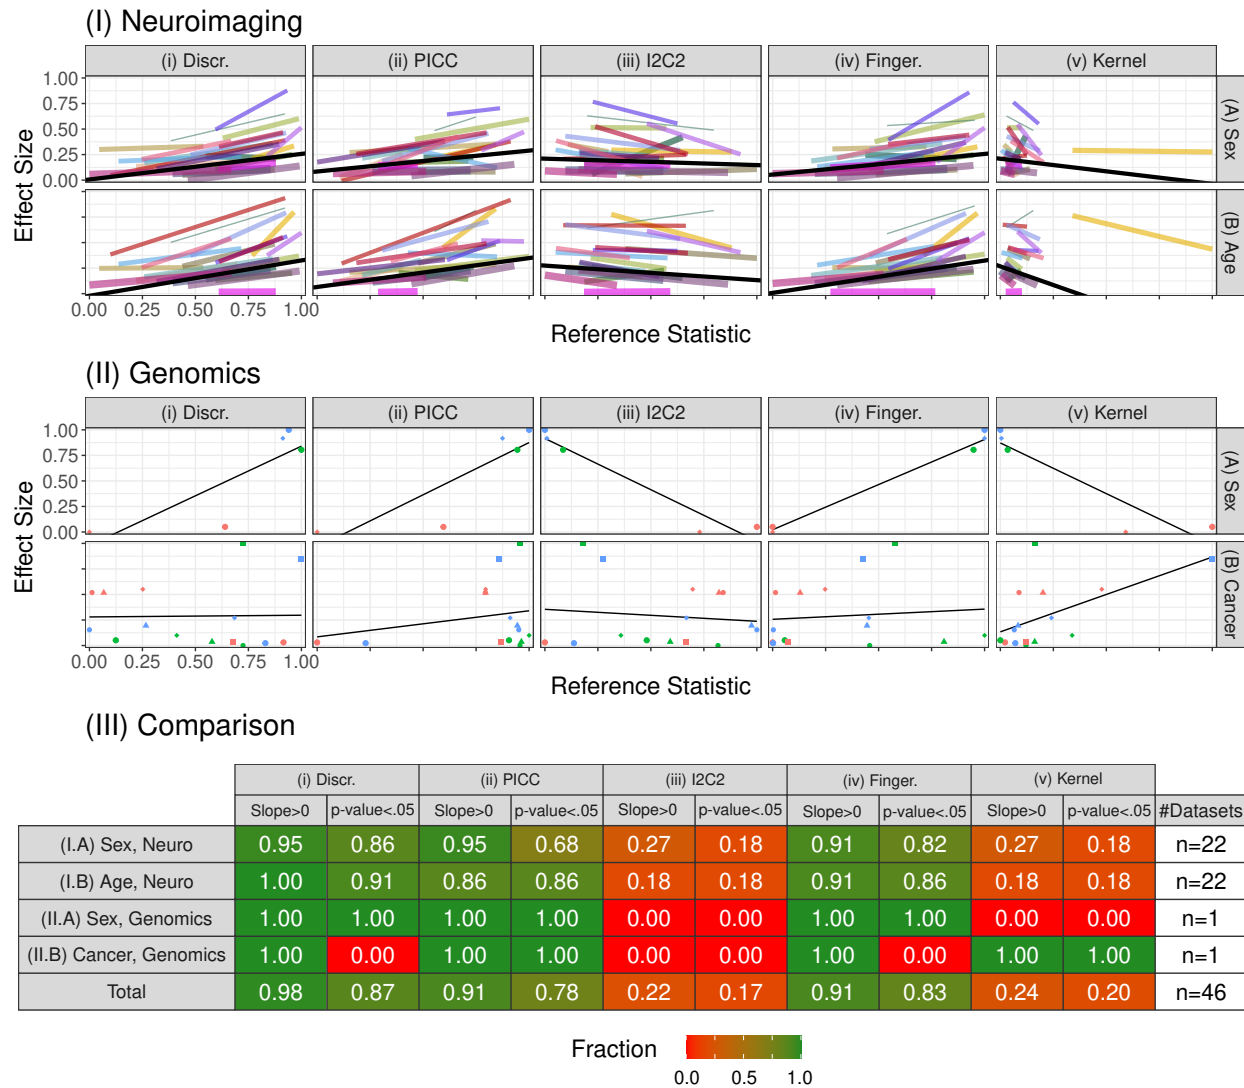

Figure 5: **Optimizing Discr improves downstream inference performance.** Using the connectomes from the 64 pipelines with raw edge-weights, we examine the relationship between connectomes vs sex and age. The columns evaluate difference approaches for computing pipeline effectiveness, including (i) Discr, (ii) PICC, (iii) Average Fingerprint Index Fingerprint, (iv) I2C2, and (v) Kernel. Each panel shows reference pipeline reliability estimate ( $x$ -axis) versus effect size of the association between the data and the sex, age, or cancer status of the individual as measured by DCorr ( $y$ -axis). Both the  $x$  and  $y$  axes are normalized by the minimum and maximum statistic. These data are summarized by a single line per study, which is the regression of the normalized effect size onto the normalized reliability estimate as quantified by the indicated reference statistic. (I) The results for the neuroimaging data, as described in Section 3.4. Color and line width correspond to the study and number of scans, respectively (see Figure 3B). The solid black line is the weighted mean over all studies. Discr is the only statistic in which *nearly all* slopes are positive. Moreover, the corrected  $p$ -value [45, 46] is significant across most datasets for both covariates ( $\frac{39}{44} \approx .89$   $p$ -values  $< .001$ ). This indicates that pipelines with higher Discr correspond to larger effect sizes for the covariate of interest, and that this relationship is stronger for Discr than other statistics. A similar experiment is performed on two genomics datasets, measuring the effects due to sex and whether an individual has cancer. (III) indicates the fraction of datasets with positive slopes and with significantly positive slopes, ranging from 0 (“None”, red) to 1 (“All”, green), at both the task and aggregate level. Discr is the statistic where the most datasets have positive slopes, and the statistic where the most datasets have significantly positive slopes, across the neuroimaging and genomics datasets considered. Appendix F.2 details the methodologies employed.

**4 Discussion** We propose the use of the `Discr` statistic as a simple and intuitive measure for experimental design featuring multiple measurements. Numerous efforts have established the value of *quantifying* reliability, repeatability, and replicability (or discriminability) using parametric measures such as ICC and I2C2. However, they have not been used to optimize reproducibility—that is, they are only used post-hoc to determine reproducibility, not used as criteria for searching over the design space—nor have non-parametric multivariate generalizations of these statistics been available. We derive goodness of fit and comparison (equality) tests for `Discr`, and demonstrate via theory and simulation that `Discr` provides numerous advantages over existing techniques across a range of simulated settings. Our neuroimaging and genomics use-cases exemplify the utility of these features of the `Discr` framework for optimal experimental design.

An important consideration is that quantifying reliability and reproducibility with multiple measurements may seem like a limitation for many fields, in which the end derivative typically used for inference may be just a single sample for each item measured. However, a single measurement may often consist of many sub-measurements for a single individual, each of which are combined to produce the single derivative work. For example in brain imaging, a functional Magnetic Resonance Imaging (fMRI) scan consists of tens to thousands of identical scans of the brain at numerous time points. In this case, the image can be broken into identical-width time windows. In another example taken directly from the cancer genomics experiment below, a genomics count table was produced from eight independent experiments, each of which yielded a single count table. The last step of their pre-processing procedure was to aggregate to produce the single summary derivative that the experimenters traditionally considered a single measurement. In each case, the typical “measurement” unit can really be thought of as an aggregate of multiple smaller measurement units, and a researcher can leverage these smaller measurements as a surrogate for multiple measurements. In the neuroimaging example, the fMRI scan can be segmented into identical-width sub-scans with each treated as a single measurement, and in the genomics example, the independent experiments can each be used as a single measurement.

`Discr` provides a number of connections with related statistical algorithms worth further consideration. `Discr` is related to energy statistics [47], in which the statistic is a function of distances between observations [28]. Energy statistics provide approaches for goodness-of-fit (one-sample) and equality testing (two-sample), and multi-sample testing [48]. However, we note an important distinction: a goodness of fit test for discriminability can be thought of as a  $K$ -sample test in the classical literature, and a comparison of discriminabilities is analogous to a comparison of  $K$ -sample tests. Further, similar to `Discr`, energy statistics make relatively few assumptions. However, energy statistics requires a large number of measurements per item, which is often unsuitable for biological data where we frequently have only a small number of repeated measurements. `Discr` is most closely related to multiscale generalized correlation (MGC) [31, 42], which combines energy statistics with nearest neighbors, as does `Discr`. Like many energy-based statistics, `Discr` relies upon the construction of a distance matrix. As such, `Discr` generalizes readily to high-dimensional data, and many packages accelerate distance computation in high-dimensionals [49].

**Limitations** While `Discr` provides experimental design guidance for big data, other considerations may play a role in a final determination of the practical utility of an experimental design. For example, the connectomes analyzed here are *resting-state*, as opposed to *task-based* fMRI connectomes. Recent literature suggests that the global signal in a rs-fMRI scan may be correlated heavily with signals of interest for task-based approaches [50, 51], and therefore removal may be inadvisable. Thus, while `Discr` is an effective tool for experimental design, knowledge of the techniques in conjunction with the constructs under which successive inference will be performed remains essential. Further, in this study, we only consider the Euclidean distance, which may not be appropriate for all datasets of interest. For example, if the measurements live in a manifold (such as images, text, speech, and networks), one may be interested in dissimilarity or similarity functions other than Euclidean distance. To this end, `Discr`



readily generalizes to alternative comparison functions, and will produce an informative result as long as the choice of comparison function is appropriate for the measurements.

It is important to emphasize that `Discr`, as well the related statistics, are neither necessary, nor sufficient, for a measurement to be practically useful. For example, categorical covariates, such as sex, are often meaningful in an analysis, but not discriminable. Human fingerprints are discriminable, but typically not biologically useful. In this sense, while discriminability provides a valuable link between test-retest reliability and criterion validity for multivariate data, one must be careful to consider other notions of validity prior to the selection of a measurement. In addition, none of the statistics studied here are immune to sample characteristics, thus interpreting results across studies deserves careful scrutiny. For example, having a sample with variable ages will increase the inter-subject dissimilarity of any metric dependent on age (such as the connectome). With these caveats in mind, `Discr` remains as a key experimental design consideration a wide variety of settings.

**Conclusion** The use-cases provided herein serve to illustrate how `Discr` can be used to facilitate experimental design, and mitigate reproducibility issues. We envision that `Discr` will find substantial applicability across disciplines and sectors beyond brain imaging and genomics, such pharmaceutical research. To this end, we provide open-source implementations of `Discr` for both Python and R [52, 53]. Code for reproducing all the figures in this manuscript is available at <https://neurodata.io/mgc>.

**Acknowledgements** This work was partially supported by the National Science Foundation NEURONEX award DMS-1707298, the National Institute of Health award 1R01MH120482-01, and the Defense Advanced Research Projects Agency's (DARPA) SIMPLEX program through SPAWAR contract N66001-15-C-4041. X-NZ receives funding supports by the National Basic Research (973) Program (2015CB351702), the National Science Foundation of China (81471740, 81220108014), the China - Netherlands CAS-NWO Programme (153111KYSB20160020), Beijing Municipal Science and Tech Commission (Z161100002616023, Z171100000117012), the Major Project of National Social Science Foundation of China (14ZDB161), the National R&D Infrastructure and Facility Development Program of China, Fundamental Science Data Sharing Platform (DKA2017-12-02-21), Guangxi BaGui Scholarship (201621), and Microsoft Research.

## References

- [1] C Spearman. The Proof and Measurement of Association between Two Things. *Am. J. Psychol.*, 15(1):72, January 1904.
- [2] Jeffrey T Leek, Robert B Scharpf, Héctor Corrada Bravo, David Simcha, Benjamin Langmead, W Evan Johnson, Donald Geman, Keith Baggerly, and Rafael A Irizarry. Tackling the widespread and critical impact of batch effects in high-throughput data. *Nat. Rev. Genet.*, 11(10):733–739, October 2010.
- [3] Jeffrey T Leek and Roger D Peng. Statistics: *P* values are just the tip of the iceberg. <http://www.nature.com/news/statistics-p-values-are-just-the-tip-of-the-iceberg-1.17412>, April 2015. Accessed: 2020-10-12.
- [4] Steven N Goodman, Daniele Fanelli, and John P A Ioannidis. What does research reproducibility mean? *Sci. Transl. Med.*, 8(341):341ps12, June 2016.
- [5] Bin Yu et al. Stability. *Bernoulli*, 19(4):1484–1500, 2013.
- [6] John P A Ioannidis. Why most published research findings are false. *PLoS Med.*, 2(8):e124, August 2005.
- [7] Monya Baker. Over half of psychology studies fail reproducibility test. *Nature Online*, August 2015.
- [8] Prasad Patil, Roger D Peng, and Jeffrey T Leek. What Should Researchers Expect When They Replicate Studies? A Statistical View of Replicability in Psychological Science. *Perspect. Psychol. Sci.*, 11(4):539–544, July 2016.
- [9] David Trafimow and Michael Marks. Editorial. *Basic Appl. Soc. Psych.*, 37(1):1–2, January 2015.

- [10] Ronald D Fricker, Katherine Burke, Xiaoyan Han, and William H Woodall. Assessing the Statistical Analyses Used in Basic and Applied Social Psychology After Their p-Value Ban. *Am. Stat.*, 73 (sup1):374–384, March 2019.
- [11] Ronald L Wasserstein, Allen L Schirm, and Nicole A Lazar. Moving to a World Beyond “ $p < 0.05$ ”. *Am. Stat.*, 73(sup1):1–19, March 2019.
- [12] Joshua T Vogelstein. P-Values in a Post-Truth World. July 2020.
- [13] David R Heise. Separating Reliability and Stability in Test-Retest Correlation. *Am. Sociol. Rev.*, 34 (1):93–101, 1969.
- [14] Xi-Nian Zuo, Jeffrey S Anderson, Pierre Bellec, Rasmus M Birn, Bharat B Biswal, Janusch Blautzik, John C S Breitner, Randy L Buckner, Vince D Calhoun, F Xavier Castellanos, Antao Chen, Bing Chen, Jiangtao Chen, Xu Chen, Stanley J Colcombe, William Courtney, R Cameron Craddock, Adriana Di Martino, Hao-Ming Dong, Xiaolan Fu, Qiyong Gong, Krzysztof J Gorgolewski, Ying Han, Ye He, Yong He, Erica Ho, Avram Holmes, Xiao-Hui Hou, Jeremy Huckins, Tianzi Jiang, Yi Jiang, William Kelley, Clare Kelly, Margaret King, Stephen M LaConte, Janet E Lainhart, Xu Lei, Hui-Jie Li, Kaiming Li, Kuncheng Li, Qixiang Lin, Dongqiang Liu, Jia Liu, Xun Liu, Yijun Liu, Guangming Lu, Jie Lu, Beatriz Luna, Jing Luo, Daniel Lurie, Ying Mao, Daniel S Margulies, Andrew R Mayer, Thomas Meindl, Mary E Meyerand, Weizhi Nan, Jared A Nielsen, David O’Connor, David Paulsen, Vivek Prabhakaran, Zhigang Qi, Jiang Qiu, Chunhong Shao, Zarrar Shehzad, Weijun Tang, Arno Villringer, Huiling Wang, Kai Wang, Dongtao Wei, Gao-Xia Wei, Xu-Chu Weng, Xuehai Wu, Ting Xu, Ning Yang, Zhi Yang, Yu-Feng Zang, Lei Zhang, Qinglin Zhang, Zhe Zhang, Zhiqiang Zhang, Ke Zhao, Zonglei Zhen, Yuan Zhou, Xing-Ting Zhu, and Michael P Milham. An open science resource for establishing reliability and reproducibility in functional connectomics. *Sci Data*, 1: 140049, December 2014.
- [15] David O’Connor, Natan Vega Potler, Meagan Kovacs, Ting Xu, Lei Ai, John Pellman, Tamara Vanderwal, Lucas C Parra, Samantha Cohen, Satrajit Ghosh, Jasmine Escalera, Natalie Grant-Villegas, Yael Osman, Anastasia Bui, R Cameron Craddock, and Michael P Milham. The Healthy Brain Network Serial Scanning Initiative: a resource for evaluating inter-individual differences and their reliabilities across scan conditions and sessions. *Gigascience*, 6(2):1–14, February 2017.
- [16] Xi-Nian Zuo, Ting Xu, and Michael Peter Milham. Harnessing reliability for neuroscience research. *Nat Hum Behav*, 3(8):768–771, August 2019.
- [17] Aki Nikolaidis, Anibal Solon Heinsfeld, Ting Xu, Pierre Bellec, Joshua Vogelstein, and Michael Milham. Bagging Improves Reproducibility of Functional Parcellation of the Human Brain. July 2019.
- [18] David J Hand. *Measurement: A Very Short Introduction*. Oxford University Press, 1 edition edition, 2016.
- [19] Ronald A Fisher. *The Design of Experiments*. Macmillan Pub Co, 1935.
- [20] R E Kirk. Experimental Design. In Irving Weiner, editor, *Handbook of Psychology, Second Edition*, volume 12, page 115. John Wiley & Sons, Inc., Hoboken, NJ, USA, September 2012.
- [21] Anders M Dale. Optimal experimental design for event-related fmri. *Human brain mapping*, 8(2-3): 109–114, 1999.
- [22] Liam Paninski. Asymptotic theory of information-theoretic experimental design. *Neural Comput.*, 17(7):1480–1507, July 2005.
- [23] Lee J Cronbach, Nageswari Rajaratnam, and Goldine C Gleser. THEORY OF GENERALIZABILITY: A LIBERALIZATION OF RELIABILITY THEORY. *Br. J. Math. Stat. Psychol.*, 16(2):137–163, November 1963.
- [24] Stephanie Noble, Marisa N Spann, Fuyuze Tokoglu, Xilin Shen, R Todd Constable, and Dustin Scheinost. Influences on the Test-Retest Reliability of Functional Connectivity MRI and its Relationship with Behavioral Utility. *Cereb. Cortex*, 27(11):5415–5429, November 2017.
- [25] S Wang, Z Yang, M Milham, C Craddock, X-N Zuo, C E Priebe, and J T Vogel-

- stein. Optimal Experimental Design for Generating Reference Connectome Datasets. In *Organization for Human Brain Mapping*, June 2015.
- [26] Zeyi Wang, Eric W Bridgeford, Joshua T Vogelstein, and et al Caffo, Brian. Statistical analysis of data reproducibility measures.
- [27] Xi-Nian Zuo, Jeffrey S Anderson, Pierre Bellec, Rasmus M Birn, Bharat B Biswal, Janusch Blautzik, John CS Breitner, Randy L Buckner, Vince D Calhoun, F Xavier Castellanos, et al. An open science resource for establishing reliability and reproducibility in functional connectomics. *Scientific data*, 1:140049, 2014.
- [28] Maria L Rizzo and Gábor J Székely. Energy distance. *WIREs Comput Stat*, 8(1):27–38, January 2016.
- [29] Krikamol Muandet, Kenji Fukumizu, Bharath Sriperumbudur, and Bernhard Schölkopf. Kernel Mean Embedding of Distributions: A Review and Beyond. *Foundations and Trends® in Machine Learning*, 10(1-2):1–141, June 2017.
- [30] Cencheng Shen, Carey E. Priebe, and Joshua T. Vogelstein. The Exact Equivalence of Independence Testing and Two-Sample Testing. *arXiv*, Oct 2019. URL <https://arxiv.org/abs/1910.08883>.
- [31] Joshua T Vogelstein, Eric W Bridgeford, Qing Wang, Carey E Priebe, Mauro Maggioni, and Cencheng Shen. Discovering and deciphering relationships across disparate data modalities. *Elife*, 8, January 2019. URL <http://dx.doi.org/10.7554/eLife.41690>.
- [32] Emily S Finn, Xilin Shen, Dustin Scheinost, Monica D Rosenberg, Jessica Huang, Marvin M Chun, Xenophon Papademetris, and R Todd Constable. Functional connectome fingerprinting: identifying individuals using patterns of brain connectivity. *Nat. Neurosci.*, 18(11):1664–1671, November 2015.
- [33] Patrick E Shrout and Joseph L Fleiss. Intraclass correlations: uses in assessing rater reliability. *Psychological bulletin*, 86(2):420, 1979.
- [34] Zeyi Wang, Haris Sair, Ciprian Crainiceanu, Martin Lindquist, Bennett A Landman, Susan Resnick, Joshua T Vogelstein, and Brian Caffo. On statistical tests of functional connectome fingerprinting. October 2018.
- [35] Edward G Carmines and Richard A Zeller. *Reliability and Validity Assessment*. SAGE Publications, November 1979.
- [36] Arthur Gretton, Karsten M. Borgwardt, Malte J. Rasch, Bernhard Schölkopf, and Alexander Smola. A Kernel Two-Sample Test. *Journal of Machine Learning Research*, 13(Mar):723–773, 2012. ISSN 1533-7928. URL <http://jmlr.csail.mit.edu/papers/v13/gretton12a.html>.
- [37] Xi-Nian Zuo, Clare Kelly, Jonathan S Adelstein, Donald F Klein, F Xavier Castellanos, and Michael P Milham. Reliable intrinsic connectivity networks: test–retest evaluation using ica and dual regression approach. *Neuroimage*, 49(3):2163–2177, 2010.
- [38] Bharat B Biswal, Maarten Mennes, Xi-Nian Zuo, Suril Gohel, Clare Kelly, Steve M Smith, Christian F Beckmann, Jonathan S Adelstein, Randy L Buckner, Stan Colcombe, et al. Toward discovery science of human brain function. *Proceedings of the National Academy of Sciences*, 107(10): 4734–4739, 2010.
- [39] S Sikka, B Cheung, R Khanuja, S Ghosh, C Yan, Q Li, J Vogelstein, R Burns, S Colcombe, C Craddock, et al. Towards automated analysis of connectomes: The configurable pipeline for the analysis of connectomes (c-pac). In *5th INCF Congress of Neuroinformatics*, Munich, Germany, volume 10, 2014.
- [40] Gregory Kiar, Eric Bridgeford, Will Gray Roncal, Consortium for Reliability (CoRR), Reproducibility, Vikram Chandrashekar, Disa Mhembere, Sephira Ryman, Xi-Nian Zuo, Daniel S Margulies, R Cameron Craddock, Carey E Priebe, Rex Jung, Vince Calhoun, Brian Caffo, Randal Burns, Michael P Milham, and Joshua Vogelstein. A High-Throughput Pipeline Identifies Robust Connectomes But Troublesome Variability. *bioRxiv*, page 188706, apr 2018. doi: 10.1101/188706. URL <https://www.biorxiv.org/content/early/2018/04/24/188706>.

- [41] Cameron Craddock, Sharad Sikka, Brian Cheung, Ranjeet Khanuja, Satrajit S Ghosh, Chaogan Yan, Qingyang Li, Daniel Lurie, Joshua Vogelstein, Randal Burns, Stanley Colcombe, Maarten Mennes, Clare Kelly, Adriana Di Martino, Francisco X. Castellanos, and Michael Milham. Towards automated analysis of connectomes: The configurable pipeline for the analysis of connectomes (C-PAC). *Frontiers in Neuroinformatics*, July 2013.
- [42] Cencheng Shen, Carey E Priebe, and Joshua T Vogelstein. From Distance Correlation to Multi-scale Generalized Correlation. *Journal of American Statistical Association*, October 2017. URL <http://arxiv.org/abs/1710.09768>.
- [43] Ivan Carcamo-Orive, Gabriel E. Hoffman, Paige Cundiff, Noam D. Beckmann, Sunita L. D'Souza, Joshua W. Knowles, Achchhe Patel, Dimitri Papatsenko, Fahim Abbasi, Gerald M. Reaven, Sean Whalen, Philip Lee, Mohammad Shahbazi, Marc Y. R. Henrion, Kuixi Zhu, Sven Wang, Panos Roussos, Eric E. Schadt, Gaurav Pandey, Rui Chang, Thomas Quertermous, and Ihor Lemischka. Analysis of Transcriptional Variability in a Large Human iPSC Library Reveals Genetic and Non-genetic Determinants of Heterogeneity. *Cell Stem Cell*, 20(4):518–5329, Apr 2017. ISSN 1875-9777. doi: 10.1016/j.stem.2016.11.005.
- [44] Christopher Douville, Joshua D. Cohen, Janine Ptak, Maria Popoli, Joy Schaefer, Natalie Silliman, Lisa Dobbyn, Robert E. Schoen, Jeanne Tie, Peter Gibbs, Michael Goggins, Christopher L. Wolfgang, Tian-Li Wang, le-Ming Shih, Rachel Karchin, Anne Marie Lennon, Ralph H. Hruban, Cristian Tomasetti, Chetan Bettgowda, Kenneth W. Kinzler, Nickolas Papadopoulos, and Bert Vogelstein. Assessing aneuploidy with repetitive element sequencing. *Proc. Natl. Acad. Sci. U.S.A.*, 117(9): 4858–4863, Mar 2020. ISSN 0027-8424. doi: 10.1073/pnas.1910041117.
- [45] Ronald Aylmer Fisher. *Statistical methods for research workers*. Genesis Publishing Pvt Ltd, 1925.
- [46] Achim Zeileis. Object-oriented computation of sandwich estimators. *Journal of Statistical Software, Articles*, 16(9):1–16, 2006.
- [47] Gábor J Székely and Maria L Rizzo. Energy statistics: A class of statistics based on distances. *J. Stat. Plan. Inference*, 143(8):1249–1272, August 2013.
- [48] Maria L Rizzo, Gábor J Székely, et al. Disco analysis: A nonparametric extension of analysis of variance. *The Annals of Applied Statistics*, 4(2):1034–1055, 2010.
- [49] Da Zheng, Disa Mhembere, Joshua T Vogelstein, Carey E Priebe, and Randal Burns. FlashR: parallelize and scale R for machine learning using SSDs. *Proceedings of the 23rd*, 53(1):183–194, February 2018. URL <https://dl.acm.org/citation.cfm?id=3178501>.
- [50] Kevin Murphy and Michael D Fox. Towards a consensus regarding global signal regression for resting state functional connectivity MRI. *Neuroimage*, 154:169–173, July 2017.
- [51] Thomas T Liu, Alican Nalci, and Maryam Falahepour. The global signal in fMRI: Nuisance or information? *Neuroimage*, 150:213–229, April 2017.
- [52] Sambit Panda, Satish Palaniappan, Junhao Xiong, Ananya Swaminathan, Sandhya Ramachandran, Eric W Bridgeford, Cencheng Shen, and Joshua T Vogelstein. mgcpy: A comprehensive high dimensional independence testing python package. July 2019.
- [53] Eric Bridgeford, Censheng Shen, Shangsi Wang, and Joshua T. Vogelstein. Multiscale generalized correlation, May 2018. URL <https://doi.org/10.5281/zenodo.1246967>.
- [54] Shraddha Mehta, Rowena F Bastero-Caballero, Yijun Sun, Ray Zhu, Diane K Murphy, Bhushan Hardas, and Gary Koch. Performance of intraclass correlation coefficient (ICC) as a reliability index under various distributions in scale reliability studies. *Stat. Med.*, 37(18):2734–2752, August 2018.
- [55] D F Ten Cate, J J Luime, J M W Hazes, J W G Jacobs, and R Landewé. Does the intraclass correlation coefficient always reliably express reliability? comment on the article by cheung et al. *Arthritis Care Res.*, 62(9):1357–8; author reply 1358, September 2010.
- [56] Carly A Bobak, Paul J Barr, and A James O'Malley. Estimation of an inter-rater intra-class correlation coefficient that overcomes common assumption violations in the assessment of health



- measurement scales. *BMC Med. Res. Methodol.*, 18(1):93, September 2018.
- [57] Terry K Koo and Mae Y Li. A guideline of selecting and reporting intraclass correlation coefficients for reliability research. *J. Chiropr. Med.*, 15(2):155–163, June 2016.
- [58] Sharmila Vaz, Torbjörn Falkmer, Anne Elizabeth Passmore, Richard Parsons, and Pantelis Andreou. The Case for Using the Repeatability Coefficient When Calculating Test–Retest Reliability. *PLoS One*, 8(9), 2013. doi: 10.1371/journal.pone.0073990.
- [59] J J Bartko. On various intraclass correlation reliability coefficients. *Psychol. Bull.*, 1976.
- [60] Gang Chen, Paul A. Taylor, Simone P. Haller, Katharina Kircanski, Joel Stoddard, Daniel S. Pine, Ellen Leibenluft, Melissa A. Brotman, and Robert W. Cox. Intraclass correlation: Improved modeling approaches and applications for neuroimaging. *Hum. Brain Mapp.*, 39(3):1187–1206, Mar 2018. ISSN 1065-9471. doi: 10.1002/hbm.23909.
- [61] H Shou, A Eloyan, S Lee, V Zipunnikov, AN Crainiceanu, MB Nebel, B Caffo, MA Lindquist, and CM Crainiceanu. Quantifying the reliability of image replication studies: the image intraclass correlation coefficient (i2c2). *Cognitive, Affective, & Behavioral Neuroscience*, 13(4):714–724, 2013.
- [62] Carl J Huberty and Stephen Olejnik. *Applied MANOVA and Discriminant Analysis*. John Wiley & Sons, May 2006.
- [63] Noreen M Webb, Richard J Shavelson, and Edward H Haertel. 4 reliability coefficients and generalizability theory. In C R Rao and S Sinharay, editors, *Handbook of Statistics*, volume 26, pages 81–124. Elsevier, January 2006.
- [64] Emily S Finn, Dustin Scheinost, Daniel M Finn, Xilin Shen, Xenophon Papademetris, and R Todd Constable. Can brain state be manipulated to emphasize individual differences in functional connectivity? *Neuroimage*, 160:140–151, October 2017.
- [65] Nov 2013. URL <https://arxiv.org/abs/1207.6076.pdf>. [Online; accessed 23. Mar. 2020].
- [66] Cencheng Shen and Joshua T. Vogelstein. The Exact Equivalence of Distance and Kernel Methods for Hypothesis Testing. *arXiv*, Jun 2018. URL <https://arxiv.org/abs/1806.05514>.
- [67] C Shen and J T Vogelstein. The exact equivalence of distance and kernel methods for hypothesis testing. *arXiv preprint arXiv:1806.05514*, 2018.
- [68] Alexandros Karatzoglou, Alex Smola, Kurt Hornik, and Achim Zeileis. kernlab – an S4 package for kernel methods in R. *Journal of Statistical Software*, 11(9):1–20, 2004. URL <http://www.jstatsoft.org/v11/i09/>.
- [69] Maria Rizzo and Gábor Székely. E-Statistics: Multivariate inference via the energy of data [r package energy version 1.7-7].
- [70] Luc Devroye, László Györfi, and Gábor Lugosi. *A probabilistic theory of pattern recognition*, volume 31. Springer Science & Business Media, 2013.
- [71] REAC Paley and A Zygmund. On some series of functions,(3). In *Mathematical Proceedings of the Cambridge Philosophical Society*, volume 28, pages 190–205. Cambridge Univ Press, 1932.
- [72] Pierre A Devijver and Josef Kittler. *Pattern recognition: A statistical approach*. Prentice hall, 1982.
- [73] Patrick E Meyers, Ganesh C Arvapalli, Sandhya C Ramachandran, Paige F Frank, Allison D Lemmer, Eric W Bridgeford, and Joshua T Vogelstein. Standardizing human brain parcellations. *Biorxiv*, October 2019.
- [74] Stephen M Smith et al. Advances in functional and structural MR image analysis and implementation as FSL. *NeuroImage*, 23 Suppl 1:S208–19, jan 2004. ISSN 1053-8119. URL <http://www.ncbi.nlm.nih.gov/pubmed/15501092>.
- [75] Mark W Woolrich et al. Bayesian analysis of neuroimaging data in FSL. *NeuroImage*, 45(1 Suppl):S173–86, mar 2009. ISSN 1095-9572. URL <http://www.sciencedirect.com/science/article/pii/S1053811908012044>.
- [76] Mark Jenkinson et al. FSL. *NeuroImage*, 62(2):782–90, aug 2012. ISSN 1095-9572. URL <http://www.ncbi.nlm.nih.gov/pubmed/21979382>.
- [77] John Mazziotta et al. A four-dimensional probabilistic atlas of the human brain. *Journal of the*



- American Medical Informatics Association, 8(5):401–430, 2001.
- [78] Eleftherios Garyfallidis, Matthew Brett, Bagrat Amirbekian, Ariel Rokem, Stefan Van Der Walt, Maxime Descoteaux, and Ian Nimmo-Smith. Dipy, a library for the analysis of diffusion mri data. Frontiers in neuroinformatics, 8:8, 2014.
- [79] Eleftherios Garyfallidis, Matthew Brett, Marta Morgado Correia, Guy B Williams, and Ian Nimmo-Smith. Quickbundles, a method for tractography simplification. Frontiers in neuroscience, 6:175, 2012.
- [80] Disa Mhembere, William Gray Roncal, Daniel Sussman, Carey E Priebe, Rex Jung, Sephira Ryman, R Jacob Vogelstein, Joshua T Vogelstein, and Randal Burns. Computing scalable multivariate glocal invariants of large (brain-) graphs. In Global Conference on Signal and Information Processing (GlobalSIP), 2013 IEEE, pages 297–300. IEEE, 2013.
- [81] Nathalie Tzourio-Mazoyer et al. Automated anatomical labeling of activations in spm using a macroscopic anatomical parcellation of the MNI MRI single-subject brain. Neuroimage, 15(1): 273–289, 2002.
- [82] Kenichi Oishi et al. MRI atlas of human white matter. Academic Press, 2010.
- [83] Nikos Makris, Jill M Goldstein, David Kennedy, Steven M Hodge, Verne S Caviness, Stephen V Faraone, Ming T Tsuang, and Larry J Seidman. Decreased volume of left and total anterior insular lobule in schizophrenia. Schizophrenia research, 83(2):155–171, 2006.
- [84] JL Lancaster. The Talairach Daemon, a database server for Talairach atlas labels. NeuroImage, 1997. ISSN 1053-8119.
- [85] R Cameron Craddock, Saad Jbabdi, Chao-Gan Yan, Joshua T Vogelstein, F Xavier Castellanos, Adriana Di Martino, Clare Kelly, Keith Heberlein, Stan Colcombe, and Michael P Milham. Imaging human connectomes at the macroscale. Nat. Methods, 10(6):524–539, June 2013. URL <http://dx.doi.org/10.1038/nmeth.2482>.
- [86] Chandra S Sripada et al. Lag in maturation of the brain’s intrinsic functional architecture in attention-deficit/hyperactivity disorder. Proceedings of the National Academy of Sciences, 111(39):14259–14264, 2014.
- [87] Daniel Kessler et al. Modality-spanning deficits in attention-deficit/hyperactivity disorder in functional networks, gray matter, and white matter. The Journal of Neuroscience, 34(50):16555–16566, 2014.
- [88] Rahul S Desikan et al. An automated labeling system for subdividing the human cerebral cortex on MRI scans into gyral based regions of interest. NeuroImage, 2006. ISSN 1053-8119. doi: 10.1016/j.neuroimage.2006.01.021.
- [89] Ben Langmead and Steven L. Salzberg. Fast gapped-read alignment with Bowtie 2. Nat. Methods, 9(4):357–359, Mar 2012. ISSN 1548-7105. doi: 10.1038/nmeth.1923.
- [90] Cencheng Shen and Joshua T Vogelstein. Decision Forests Induce Characteristic Kernels. November 2018. URL <http://arxiv.org/abs/1812.00029>.
- [91] R Core Team. R: A Language and Environment for Statistical Computing. R Foundation for Statistical Computing, Vienna, Austria, 2013. URL <http://www.R-project.org/>. ISBN 3-900051-07-0.

## Appendix A. Data Reproducibility Statistics.

**A.1 Intraclass Correlation Coefficient** The intraclass correlation coefficient (ICC) is a commonly used data reproducibility statistic [33]. The absolute agreement ICC, or  $ICC(1, 1)$ , is the fraction of the total variability that is across-item variability, that is, ICC is defined as the across-item variability divided by the within-item plus across-item variability. ICC has several limitations. First, it is univariate, meaning if the data are multidimensional, they must first be represented by univariate statistics, thereby discarding multivariate information. This potentially makes ICC unsuitable when an informative univariate summary measure is unavailable or unknown, which is frequently the case in the high dimensional data that is the focus of this manuscript. Second, ICC is based on a Gaussian assumption characterizing the data. Thus, any deviations from this assumption may render the interpretation of the magnitude of ICC questionable, because non-Gaussian measurements that are highly reproducible could potentially yield quite low ICC [54–56]. Third, the Intraclass correlation coefficient is highly sensitive to the design of the study [56, 57]; care must be taken to ensure that the form of ICC chosen accurately reflects the design of the study of interest. Further, ICC is substantially impacted by the presence of outliers in measurements [58]. Finally, there are numerous definitions of estimates of ICC [33] designed for different experimental setups, and researchers regularly use (and misuse) the different estimators in generic contexts [56, 59]. In practice, it is unclear the extent to which the use of inappropriate estimators of ICC is impactful [60].

Numerous multivariate generalizations of the ICC attempt to overcome to requirement of ICC to operate on univariate data. The Image Intra-Class Correlation (I2C2) was introduced to mitigate ICC's univariate limitation [61]. Specifically, I2C2 operates on covariances matrices, rather than variances. To obtain a univariate summary of reproducibility, I2C2 operates on the trace of the covariance matrices, one of several possible strategies, similar to most multivariate analysis of variance procedures [62]. Thus, while overcoming one limitation of ICC, I2C2 still heavily leverages Gaussian assumptions of the data to justify its validity. Webb et al. [63] highlight a number of limitations with using estimates of covariance in the context of assessing multivariate reliability. Chiefly, sampling variance of covariance components in the high dimensionality; low-sample-size (HDLSS) regime is problematic, which is a characteristic of increasing prevalence in biological data.

**A.2 Fingerprinting Index** The fingerprinting index [32, 64] provides a metric for quantifying individual connectivity profiles in resting-state MRI (fMRI). Specifically, the fingerprinting index operates on the pairwise correlation of the vectorized connectivity matrices. A high fingerprinting index corresponds to the connectivity matrices being most strongly correlated within-subject versus between-subject. An important clarification for fingerprinting is that the connectivity matrices must be more strongly correlated than *any other measurement* within a particular scanning session, otherwise the fingerprinting index will be 0, as the fingerprinting index uses only the nearest-neighbor associated with a given item. Unlike the other strategies employed in this manuscript, the fingerprinting index produces a statistic for each possible ordering of 2 measurement sessions, that is, if each item is measured  $s$  times, fingerprinting produces  $s(s - 1)$  statistics. To enable fingerprinting for assessing the effectiveness of a strategy, we instead averaged across all  $s(s - 1)$  statistics, which will henceforth be referred to as Fingerprinting.

**A.3 Kendall's Coefficient of Concordance** Kendall's Coefficient of Concordance, or Kendall's  $W$ , is a univariate non-parametric statistic for assessing the extent to which multiple measurements of the same item agree. Like inter-item discriminability and the fingerprinting index, estimates of Kendall's  $W$  operate on the ranks of data. Specifically, Kendall's  $W$  computes the total rank of all measurements associated with a single item, and compares an item's total rank to the average value of the total rank. An important consideration is that Kendall's  $W$  operates directly on the measurements themselves, rather than on scalar summary measures of the relationships amongst the measurements. As such,

Kendall's  $W$  cannot be applied directly to data that is inherently multivariate using traditional methods of ranking. For this reason, we do not formally evaluate Kendall's  $W$  within the context of this manuscript.

**A.4 Kernel Methods** Maximum mean discrepancy (MMD) [36] provides a non-parametric framework for comparing whether two samples are drawn from the same distribution. MMD subverts Gaussian assumptions by embedding the points in a reproducing kernel Hilbert Space (RKHS), and looking for functions over the unit ball in the RKHS which maximize the difference in the means of the embedded points. In the two-item regime, MMD can be shown to be equivalent to the Hilbert-Schmidt Independence Criterion (HSIC) [30, 65, 66], which provides a natural generalization of MMD when the number of classes exceeds two. To date, to our knowledge, there does not exist a k-sample variant of MMD.

Distance Components (DISCO) [48] extends the classical Analysis of Variance (ANOVA) framework to cases where the distributions are not necessarily Gaussian. In contrast to ANOVA which makes simplifying assumptions of normality, DISCO operates on the dispersion of the samples based on the Euclidean Distance, comparing the within-class dispersion to the between-class dispersion. DISCO produces a consistent test against general alternatives as the number of observations  $s$  per item goes to infinity. Shen and Vogelstein [67] shows a closed form relationship between Kernel and other Energy statistics approaches, such as Distance correlation. The result is that using Distance correlation for k-sample testing results in a test statistic that has bias relative to the Kernel statistic, but will yield the same p-value. Further, Shen and Vogelstein [67] shows the equivalence between Distance correlation and HSIC/MMD. Thus, in this manuscript, we use Kernel to refer to either DISCO or MMD as appropriate. In all cases, we use the default kernel, which is the Gaussian kernel with the typical bandwidth specification, as implemented in the kernlab package [68] (MMD) and energy (DISCO) package [69]. Note that in many real data scenarios,  $s$  is small (particularly, most "repeat measurements" datasets have  $s = 2$ ), and the finite-sample performance of Kernel on such a small number of repeat trials is not known.

## Appendix B. Population and Sample Discr.

Suppose that  $\theta_i \in \Theta$  represents a physical property of interest for a particular item  $i$ . In a biological context, for instance, an item could be a participant in a study, and the property of interest could be the individual's true brain network, or connectome. We cannot directly observe the physical property, but rather, we must first measure  $\theta_i$  and then "wrangle" it. Call the measurement function,  $f \in \mathcal{F}$  for a family of possible measurement functions  $\mathcal{F}$ . That is,  $g : \Theta \rightarrow \mathcal{W}$ . So, measurements of  $\theta_i$  are observed as  $f(\theta_i) = w_i$ . However,  $w_i$  may be a noisy, with measurement artefacts. Alternately,  $w_i$  might not be the property of interest, for example, if the property is a network, perhaps  $w_i$  is a multivariate time-series, from which we can estimate a network. We therefore have another function,  $f \in \mathcal{G} : \mathcal{W} \rightarrow \mathcal{X}$ , which represents the data wrangling procedure to take the measurement and produce an informative derivative (for instance, confound removal). The family of possible data wrangling procedures to produce the informative derivative is  $\mathcal{G}$ . In this fashion, the output of interest is  $x_i = f(g(\theta_i))$ .

The goal of experimental design is to choose an  $f$  and  $g$  that yield high-quality and useful inferences, that is, that yield  $x$ 's that we can use for various inferential purposes. When we have repeated measurements of the same items, we can use those samples to our advantage. Given  $x_i^j$ , which is the  $j^{\text{th}}$  measurement of sample  $i$ , we would expect  $x_i^j$  to be more similar to  $x_i^{j'}$  (another measurement of the same item), than to any measurement of a different item  $x_{i'}^{j''}$ . Formally, let  $\delta : \mathcal{X} \times \mathcal{X} \rightarrow [0, \infty)$  be a distance metric, we define the population Discr:

$$D_{\delta, f, g} = \mathbb{P}\left(\delta(x_i^j, x_i^{j'}) < \delta(x_i^j, x_{i'}^{j''})\right)$$

That is, "population Discr"  $D$  represents the average probability that the *within-item distance*  $\delta(x_i^j, x_i^{j'})$  is less than the *between-item distance*  $\delta(x_i^j, x_{i'}^{j''})$ . Discr depends on the choice of distance  $\delta$ , as well as the measurement protocol  $f$  and the analysis choices  $g$ .

The population  $\text{Discr}$  represents a property of the distribution of  $\theta_i$ . In real data since we do not observe the true distribution, we instead rely on the sample  $\text{Discr}$ . Suppose a dataset consists of  $i \in \{1, \dots, n\}$  items, where each item  $i$  has  $J_i$  repeat measurements. The sample  $\text{Discr}$  is defined:

$$\text{Discr}\left\{\mathbf{x}_i^j\right\}_{j \in [J_i], i \in [n]} = \frac{\sum_{i \in [n]} \sum_{j \in [J_i]} \sum_{j' \neq j} \sum_{i' \neq i} \sum_{j'' \in [J_{i'}]} \left( \mathbb{1}_{\{\delta(\mathbf{x}_i^j, \mathbf{x}_i^{j'}) < \delta(\mathbf{x}_i^j, \mathbf{x}_{i'}^{j''})\}} \right)}{\sum_{i \in [n]} \sum_{j \in [J_i]} \sum_{j' \neq j} \sum_{i' \neq i} \sum_{j'' \in [J_{i'}]} 1}.$$

It can be shown [26] that the under the multivariate additive noise model in Assumption 2; that is,  $\mathbf{x}_i^j = \theta_i + \epsilon_i^j$  where  $\epsilon_i^j \stackrel{iid}{\sim} f_\epsilon$ ,  $\text{var}(\epsilon_i^j) < \infty$ , and  $\mathbb{E}[\epsilon_i^j] = \mathbf{c}$ , that the sample  $\text{Discr}$ ,  $\text{Discr}$  is both a consistent and unbiased estimator for population  $\text{Discr}$ .

### Appendix C. $\text{Discr}$ Provides an Informative Bound for Inference.

During experimental design, the extent of subsequent inference tasks may be unknown. A natural question may be, what are the implications of the selection of a discriminable experimental design? Formally, assume the task of interest is binary classification: that is,  $\mathcal{Y} = \{0, 1\}$ , and we seek a classifier  $h: \mathcal{X} \rightarrow \mathcal{Y}$ . The goal of experimental design in this context is to choose the options  $(f^*, g^*)$  that will minimize the classification loss:

$$(f^*, g^*) = \underset{(f, g) \in \mathcal{F} \times \mathcal{G}}{\text{argmin}} \mathbb{P}(h(f(g(\theta))) \neq y).$$

For a fixed  $(f, g)$ , the minimal prediction error is achieved by the Bayes optimal classifier [70]:

$$\begin{aligned} (1) \quad h_{f, g}^*(\theta_i) &\triangleq \underset{y \in \{0, 1\}}{\text{argmax}} \mathbb{P}(y_i = y | f(g(\theta_i))) \pi_y \\ (2) \quad &= \underset{y \in \{0, 1\}}{\text{argmax}} \log \mathbb{P}(y_i = y | f(g(\theta_i))) + \log \pi_y, \end{aligned}$$

where  $\pi_y = \mathbb{P}(y_i = y)$ , and let  $L_{f, g}^*$  denote the error of the Bayes optimal classifier; that is, the error achieved by  $h_{f, g}^*$ .

#### Assumption 2 (Multivariate Additive Noise Setting).

We suppose following the multivariate additive Gaussian noise setting:

$$\begin{aligned} y_i &\stackrel{iid}{\sim} \text{Bern}(\pi_1), \\ \theta_i &\stackrel{iid}{\sim} \mathcal{N}(\boldsymbol{\mu}_{y_i}, \boldsymbol{\Sigma}_\theta), \\ \epsilon_i^j &\stackrel{iid}{\sim} \mathcal{N}(\mathbf{c}, \boldsymbol{\Sigma}_\epsilon) \text{ independent of } \theta_i, \\ \mathbf{x}_i^j &= \theta_i + \epsilon_i^j = f(g(\theta_i)). \end{aligned}$$

To connect the above model with Eq. (1), we can let

$$g(\theta_i) = \theta_i + \boldsymbol{\eta}_i^j, \quad f(g(\theta_i)) = \theta_i + \boldsymbol{\eta}_i^j + \boldsymbol{\tau}_i^j, \quad \epsilon_i^j = \boldsymbol{\eta}_i^j + \boldsymbol{\tau}_i^j,$$

where we assume that  $\boldsymbol{\eta}_i^j \perp \boldsymbol{\tau}_i^j$ , and both  $\boldsymbol{\eta}_i^j$  and  $\boldsymbol{\tau}_i^j$  are multivariate Gaussian. Using Bayes rule and Assumption 2, note that the probability that an observation  $\mathbf{x}_i^j$  is from class  $y$  is given by:

$$\mathbb{P}(y_i = y | \mathbf{x}_i^j) = \frac{\mathbb{P}(\mathbf{x}_i^j | y_i = y) \mathbb{P}(y_i = y)}{\mathbb{P}(\mathbf{x}_i^j)}$$

$$\Rightarrow \log \mathbb{P}(y_i = y | \mathbf{x}_i^j) \propto -\frac{1}{2}(\mathbf{x}_i^j - \boldsymbol{\mu}_y)^\top \boldsymbol{\Sigma}_x (\mathbf{x}_i^j - \boldsymbol{\mu}_y) + \log(\pi_y)$$

where  $\boldsymbol{\Sigma}_x = \boldsymbol{\Sigma}_\theta + \boldsymbol{\Sigma}_\epsilon$  is constant between the two classes (that is, the variance is homoscedastic), and  $y$  is a generic value in  $\{0, 1\}$  that a realization  $y_i$  can take. This follows directly by taking the log of the density function of the multivariate normal distribution, and removing terms not proportional in  $y$ . The Bayes optimal classifier is:

$$h_{f,g}^*(\mathbf{x}_i^j) = \operatorname{argmax}_{y \in \{0,1\}} \left[ -\frac{1}{2}(\mathbf{x}_i^j - \boldsymbol{\mu}_y)^\top \boldsymbol{\Sigma}_x (\mathbf{x}_i^j - \boldsymbol{\mu}_y) + \log \pi_y \right].$$

The Bayes error can be computed explicitly using that:

$$L_{f,g}^* \triangleq \mathbb{E} \left[ \mathbb{1}_{h_{f,g}^*(\mathbf{x}_i^j) \neq y} \right] = \sum_{y \in \{0,1\}} \int_{\mathcal{X}} \mathbb{P}(h_{f,g}^*(\mathbf{x}) \neq y) d\mathbf{x},$$

using standard rules of integration.

Importantly, the Bayes error can, in fact, be upper bounded by a decreasing function of  $\text{Discr}$ , as shown in the theorem. In words, this theorem specifies the desirability of high  $\text{Discr}$ : a higher discriminability results in a lower bound on the error of future inferential tasks. Correspondingly, a strategy with a higher discriminability will have a lower bound on the error than another strategy with a lower discriminability.

**Theorem 2.** *Let  $\mathbf{x}_i^j$  follow the multivariate additive noise setting, given in Assumption 2, where  $i = 1, \dots, n$ , and  $j = 1, \dots, s$ . Then there exists a decreasing function  $\gamma(\cdot)$  of the discriminability  $D$  where:*

$$L_{f,g}^* \leq \gamma(D_{f,g})$$

where  $L^*$  is the Bayes error, or the error achieved by the Bayes optimal classifier  $h_{f,g}^*(\boldsymbol{\theta}_i)$ .

*Proof of Theorem (2).*

Consider the additive noise setting, that is  $\mathbf{x}_i^j = \boldsymbol{\theta}_i + \boldsymbol{\epsilon}_i^j$ ,

$$\begin{aligned} D &= \mathbb{P}(\delta_{i,t,t'} < \delta_{i,t',t''}) \\ &= \mathbb{P}(\|\mathbf{x}_i^j - \mathbf{x}_i^{j'}\| < \|\mathbf{x}_i^j - \mathbf{x}_i^{j''}\|) \\ &= \mathbb{P}(\|\boldsymbol{\epsilon}_i^j - \boldsymbol{\epsilon}_i^{j'}\| < \|\boldsymbol{\theta}_i + \boldsymbol{\epsilon}_i^j - \boldsymbol{\theta}_i - \boldsymbol{\epsilon}_i^{j''}\|) \\ &\leq \mathbb{P}(\|\boldsymbol{\epsilon}_i^j - \boldsymbol{\epsilon}_i^{j'}\| < \|\boldsymbol{\theta}_i - \boldsymbol{\theta}_i\| + \|\boldsymbol{\epsilon}_i^j - \boldsymbol{\epsilon}_i^{j''}\|) \\ &= \mathbb{P}(\|\boldsymbol{\epsilon}_i^j - \boldsymbol{\epsilon}_i^{j'}\| - \|\boldsymbol{\epsilon}_i^j - \boldsymbol{\epsilon}_i^{j''}\| < \|\boldsymbol{\theta}_i - \boldsymbol{\theta}_i\|) \\ &= \frac{1}{2} \mathbb{P}(\|\boldsymbol{\epsilon}_i^j - \boldsymbol{\epsilon}_i^{j'}\| - \|\boldsymbol{\epsilon}_i^j - \boldsymbol{\epsilon}_i^{j''}\| < \|\boldsymbol{\theta}_i - \boldsymbol{\theta}_i\| \mid \|\boldsymbol{\epsilon}_i^j - \boldsymbol{\epsilon}_i^{j'}\| - \|\boldsymbol{\epsilon}_i^j - \boldsymbol{\epsilon}_i^{j''}\| < 0) + \\ &\quad \frac{1}{2} \mathbb{P}(\|\boldsymbol{\epsilon}_i^j - \boldsymbol{\epsilon}_i^{j'}\| - \|\boldsymbol{\epsilon}_i^j - \boldsymbol{\epsilon}_i^{j''}\| < \|\boldsymbol{\theta}_i - \boldsymbol{\theta}_i\| \mid \|\boldsymbol{\epsilon}_i^j - \boldsymbol{\epsilon}_i^{j'}\| - \|\boldsymbol{\epsilon}_i^j - \boldsymbol{\epsilon}_i^{j''}\| > 0) \\ &= \frac{1}{2} + \frac{1}{2} \mathbb{P}(\|\boldsymbol{\epsilon}_i^j - \boldsymbol{\epsilon}_i^{j'}\| - \|\boldsymbol{\epsilon}_i^j - \boldsymbol{\epsilon}_i^{j''}\| < \|\boldsymbol{\theta}_i - \boldsymbol{\theta}_i\| \mid \|\boldsymbol{\epsilon}_i^j - \boldsymbol{\epsilon}_i^{j'}\| - \|\boldsymbol{\epsilon}_i^j - \boldsymbol{\epsilon}_i^{j''}\| > 0) \\ &= \frac{1}{2} + \frac{1}{2} \mathbb{P}(\|\boldsymbol{\epsilon}_i^j - \boldsymbol{\epsilon}_i^{j'}\| - \|\boldsymbol{\epsilon}_i^j - \boldsymbol{\epsilon}_i^{j''}\| < \|\boldsymbol{\theta}_i - \boldsymbol{\theta}_i\|) \\ &= 1 - \frac{1}{2} \mathbb{P}(\|\boldsymbol{\epsilon}_i^j - \boldsymbol{\epsilon}_i^{j'}\| - \|\boldsymbol{\epsilon}_i^j - \boldsymbol{\epsilon}_i^{j''}\| > \|\boldsymbol{\theta}_i - \boldsymbol{\theta}_i\|). \end{aligned}$$



To bound the probability above, we bound the  $\|\boldsymbol{\theta}_i - \boldsymbol{\theta}_{i'}\|$  and  $\|\boldsymbol{\epsilon}_i^j - \boldsymbol{\epsilon}_i^{j'}\| - \|\boldsymbol{\epsilon}_i^j - \boldsymbol{\epsilon}_i^{j''}\|$  separately. We start with the first term

$$\mathbb{E}(\|\boldsymbol{\theta}_i - \boldsymbol{\theta}_{i'}\|^2) = \mathbb{E}(\boldsymbol{\theta}_i^T \boldsymbol{\theta}_i + \boldsymbol{\theta}_{i'}^T \boldsymbol{\theta}_{i'} - 2\boldsymbol{\theta}_i^T \boldsymbol{\theta}_{i'}) = 2\sigma_2^2.$$

Here,  $\sigma_2^2 = \text{tr}(\boldsymbol{\Sigma}_\theta)$  is the trace of covariance matrix of  $\boldsymbol{\theta}_i$ . We can apply Markov's Inequality for any  $t > 0$ :

$$(3) \quad \mathbb{P}(\|\boldsymbol{\theta}_i - \boldsymbol{\theta}_{i'}\| < t) \geq 1 - \frac{2\sigma_2^2}{t^2}.$$

Let  $a$  and  $b$  be two constants satisfy:

$$\begin{aligned} \mathbb{E}(\|\boldsymbol{\epsilon}_i^j - \boldsymbol{\epsilon}_i^{j'}\| - \|\boldsymbol{\epsilon}_i^j - \boldsymbol{\epsilon}_i^{j''}\|)^2 &\geq a^2 \sigma_\epsilon^2, \\ \frac{\mathbb{E}^2(\|\boldsymbol{\epsilon}_i^j - \boldsymbol{\epsilon}_i^{j'}\| - \|\boldsymbol{\epsilon}_i^j - \boldsymbol{\epsilon}_i^{j''}\|)^2}{\mathbb{E}(\|\boldsymbol{\epsilon}_i^j - \boldsymbol{\epsilon}_i^{j'}\| - \|\boldsymbol{\epsilon}_i^j - \boldsymbol{\epsilon}_i^{j''}\|)^4} &\geq b \end{aligned}$$

Furthermore, let  $t^2 = \sqrt{2}a\sigma_\epsilon\sigma_\theta$ , and define:

$$\theta = \frac{t^2}{\mathbb{E}(\|\boldsymbol{\epsilon}_i^j - \boldsymbol{\epsilon}_i^{j'}\| - \|\boldsymbol{\epsilon}_i^j - \boldsymbol{\epsilon}_i^{j''}\|)^2} \leq \frac{\sqrt{2}a\sigma_\epsilon\sigma_\theta}{a^2\sigma_\epsilon^2} = \frac{\sqrt{2}\sigma_\theta}{a\sigma_\epsilon}.$$

If  $a^2\sigma_\epsilon^2 \geq 2\sigma_\theta^2$ , then  $\theta \leq 1$ . According to the Paley-Zygmund Inequality [71], that is:

$$\mathbb{P}(Z > \theta \mathbb{E}[Z]) \geq (1 - \theta)^2 \frac{\mathbb{E}[Z]^2}{\mathbb{E}[Z^2]}$$

for all  $0 \leq \theta \leq 1$  and  $Z \geq 0$ , we can plug in the  $\theta$  above to achieve

$$\mathbb{P}(\|\boldsymbol{\epsilon}_i^j - \boldsymbol{\epsilon}_i^{j'}\| - \|\boldsymbol{\epsilon}_i^j - \boldsymbol{\epsilon}_i^{j''}\| > t^2) \geq b \left(1 - \frac{t^2}{a^2\sigma_\epsilon^2}\right)^2 = b \left(1 - \frac{\sqrt{2}\sigma_\theta}{a\sigma_\epsilon}\right)^2.$$

Plugging  $t^2$  into the inequality in Equation (3), we have:

$$\mathbb{P}(\|\boldsymbol{\theta}_i - \boldsymbol{\theta}_{i'}\|^2 < t^2) \geq 1 - \frac{2\sigma_2^2}{t^2} = 1 - \frac{\sqrt{2}\sigma_\theta}{a\sigma_\epsilon}.$$

Given that  $\boldsymbol{\theta}_i$ 's and  $\boldsymbol{\epsilon}_i^j$ 's are independent by supposition, we can combine the two inequalities:

$$\begin{aligned} D &= \mathbb{P}(\delta_{i,t,t'} < \delta_{i,i',t,t'}) \\ &= \mathbb{P}(\|\mathbf{x}_i^j - \mathbf{x}_i^{j'}\| < \|\mathbf{x}_i^j - \mathbf{x}_{i'}^{j''}\|) \\ &\leq 1 - \frac{1}{2} \mathbb{P}(\|\boldsymbol{\epsilon}_i^j - \boldsymbol{\epsilon}_i^{j'}\| - \|\boldsymbol{\epsilon}_i^j - \boldsymbol{\epsilon}_i^{j''}\| > \|\boldsymbol{\theta}_i - \boldsymbol{\theta}_{i'}\|) \\ &\leq 1 - \frac{1}{2} \mathbb{P}(\|\boldsymbol{\epsilon}_i^j - \boldsymbol{\epsilon}_i^{j'}\| - \|\boldsymbol{\epsilon}_i^j - \boldsymbol{\epsilon}_i^{j''}\| > t^2) \mathbb{P}(\|\boldsymbol{\theta}_i - \boldsymbol{\theta}_{i'}\|^2 < t^2) \\ &\leq 1 - \frac{1}{2} b \left(1 - \frac{\sqrt{2}\sigma_\theta}{a\sigma_\epsilon}\right)^3 \end{aligned}$$

Note that the resulted bound holds true even if  $a^2\sigma_\epsilon^2 < 2\sigma_\theta^2$ , as the right hand side becomes greater than 1. This produces a bound for  $\frac{\sigma_\theta}{\sigma_\epsilon}$ :

$$(4) \quad \frac{\sigma_\theta}{\sigma_\epsilon} \geq \frac{a}{\sqrt{2}} \left(1 - \left(\frac{2 - 2D}{b}\right)^{1/3}\right).$$

To obtain a bound on Bayes error, we apply Devijver and Kittler's result [72], which is that:

$$L^* \leq \frac{2\pi_0\pi_1}{1 + \pi_0\pi_1\Delta\boldsymbol{\mu}^\top\boldsymbol{\Sigma}_x^{-1}\Delta\boldsymbol{\mu}}.$$

$\Delta\boldsymbol{\mu}$  is the difference between means of two classes. Since  $\boldsymbol{\epsilon}_i^j$  is assumed to be independent of  $\mathbf{y}_i$ :

$$\Delta\boldsymbol{\mu} = \mathbb{E}(\mathbf{x}_i^j|\mathbf{y}_i = 0) - \mathbb{E}(\mathbf{x}_i^j|\mathbf{y}_i = 1) = \mathbb{E}(\boldsymbol{\theta}_i|\mathbf{y}_i = 0) - \mathbb{E}(\boldsymbol{\theta}_i|\mathbf{y}_i = 1).$$

With  $\boldsymbol{\Sigma}_x$  as the weighted covariance matrix of  $\mathbf{x}$ :

$$\begin{aligned}\boldsymbol{\Sigma}_x &= \pi_0\text{Var}(\mathbf{x}_i^j|\mathbf{y}_i = 0) + \pi_1\text{Var}(\mathbf{x}_i^j|\mathbf{y}_i = 1) \\ &= \pi_0\text{Var}(\boldsymbol{\theta}_i|\mathbf{y}_i = 0) + \pi_1\text{Var}(\boldsymbol{\theta}_i|\mathbf{y}_i = 1) + \text{Var}(\boldsymbol{\epsilon}_i^j).\end{aligned}$$

Denote  $\boldsymbol{\Sigma}' = \frac{1}{\sigma_\epsilon^2}\boldsymbol{\Sigma}_\epsilon$ . By inequality (4), note that  $\sigma_\epsilon^2 \leq \sigma_{\epsilon^*}^2(D)$ , where:

$$\sigma_{\epsilon^*}(D) = \frac{\sqrt{2}\sigma_\theta}{a(1 - (\frac{2-2D}{b})^{1/3})}.$$

Hence,  $\boldsymbol{\Sigma}_x \preceq \boldsymbol{\Sigma}_*(D)$  where:

$$\boldsymbol{\Sigma}_*(D) = \pi_0\text{Var}(\boldsymbol{\theta}_i|\mathbf{y}_i = 0) + \pi_1\text{Var}(\boldsymbol{\theta}_i|\mathbf{y}_i = 1) + \sigma_{\epsilon^*}^2\boldsymbol{\Sigma}'.$$

Therefore,  $\boldsymbol{\Sigma}_x^{-1} \succeq \boldsymbol{\Sigma}_*^{-1}(D)$ , and we obtain:

$$L^* \leq \frac{2\pi_0\pi_1}{1 + \pi_0\pi_1\Delta\boldsymbol{\mu}^\top\boldsymbol{\Sigma}_x^{-1}\Delta\boldsymbol{\mu}} \leq \frac{2\pi_0\pi_1}{1 + \pi_0\pi_1\Delta\boldsymbol{\mu}^\top\boldsymbol{\Sigma}_*^{-1}(D)\Delta\boldsymbol{\mu}} = \gamma(D). \quad \blacksquare$$

where  $\gamma(D) = \frac{2\pi_0\pi_1}{1 + \pi_0\pi_1\Delta\boldsymbol{\mu}^\top\boldsymbol{\Sigma}_*^{-1}(D)\Delta\boldsymbol{\mu}}$  is decreasing in  $D$ .

As a direct consequence of this theorem, we see:

**Corollary 3.** Assume  $(f_1, g_1)$  and  $(f_2, g_2)$  are two analysis strategies, and suppose that  $D_{f_1, g_1} > D_{f_2, g_2}$ . Then the bound on the Bayes error for  $(f_1, g_1)$  is lower than the bound on the Bayes error on  $(f_2, g_2)$ .

*Proof.* Direct application of Theorem 2, noting that  $D_{f_1, g_1} > D_{f_2, g_2}$  implies that  $\gamma(D_{f_1, g_1}) \leq \gamma(D_{f_2, g_2})$  since  $\gamma$  is decreasing in  $D$ . \blacksquare

Consequently, under the described setting, the pipeline that achieves a higher `Discr` has a lower bound on the Bayes error than competing strategies, despite the fact that the task is unknown during data acquisition and analysis. Complementarily, note that if we were to instead consider the predictive accuracy  $1 - L_{f, g}^*$ , we can obtain a similar result to obtain a lower bound on the predictive accuracy via an increasing function of `Discr`. That is, in the context of the corollary, a more discriminable pipeline will tend to have a higher bound on the accuracy for an arbitrary predictive task.

#### Appendix D. Simulations.

The following simulations were constructed, where  $\sigma_{min}, \sigma_{max}$  are the variance ranges, and settings were run at 15 intervals in  $[\sigma_{min}, \sigma_{max}]$  for 500 repetitions per setting. For a simulation setting with variance  $\sigma$ , the variance is reported as the normalized variance,  $\bar{\sigma} = \frac{\sigma - \sigma_{min}}{\sigma_{max} - \sigma_{min}}$ . Dimensionality is 2, the number of items is  $K$ , and the total number of measurements across all items is 128. Typically,  $i$  indicates the individual identifier, and  $j$  the measurement index. Notationally, in the below descriptions, we adopt the convention that  $\mathbf{z}_i^j$  obeys the true distribution for a single observation  $j$  of item  $i$ , and  $\mathbf{x}_i^j$  incorporates the controlled error term  $\boldsymbol{\epsilon}_i^j$ , which is the term which is varied the simulation. Further, each item features  $\frac{n}{K}$  measurements.

## D.1 Goodness of Fit Testing and Bayes Error

1. No Signal:  $K = 2$  items, where the true distributions for class 1 and class 2 are the same.
  - $\mathbf{z}_i^j \stackrel{iid}{\sim} \mathcal{N}(\mathbf{0}, \mathbf{I})$ ,  $i = 1, \dots, 2$ ,  $t = 1, \dots, 64$ . Note:  $\mathbf{0} \in \mathbb{R}^2$  is  $\mathbf{0}$ , and likewise for  $\mathbf{I}$
  - $\boldsymbol{\epsilon}_i^j \stackrel{iid}{\sim} \mathcal{N}(\mathbf{0}, \sigma^2 \mathbf{I})$ ,  $\sigma \in [0, 20]$
  - $\mathbf{x}_i^j = \mathbf{z}_i^j + \boldsymbol{\epsilon}_i^j \stackrel{iid}{\sim} \mathcal{N}(\mathbf{0}, (1 + \sigma^2) \mathbf{I})$
2. Cross:  $K = 2$  items, where the true distributions for class 1 and class 2 are orthogonal.
  - $\Sigma_1 = \begin{bmatrix} 2 & 0 \\ 0 & 0.1 \end{bmatrix}$ ,  $\Sigma_2 = \begin{bmatrix} 0.1 & 0 \\ 0 & 2 \end{bmatrix}$
  - $\mathbf{z}_i^j \stackrel{iid}{\sim} \mathcal{N}(\mathbf{0}, \Sigma_i)$ ,  $i = 1, 2$
  - $\boldsymbol{\epsilon}_i^j \stackrel{iid}{\sim} \mathcal{N}(\mathbf{0}, \sigma^2 \mathbf{I})$ ,  $\sigma \in [0, 20]$
  - $\mathbf{x}_i^j = \mathbf{z}_i^j + \boldsymbol{\epsilon}_i^j$
3. Gaussian:  $K = 16$  items, where the true distributions are each gaussian.
  - $\boldsymbol{\mu}_i \stackrel{iid}{\sim} \pi_1 \mathcal{N}(\mathbf{0}, 4\mathbf{I})$ ,  $i = 1, \dots, 16$
  - $\Sigma = \begin{bmatrix} 1 & 0.1 \\ 0.1 & 1 \end{bmatrix}$
  - $\mathbf{z}_i^j \stackrel{iid}{\sim} \mathcal{N}(\boldsymbol{\mu}_i, \Sigma)$
  - $\boldsymbol{\epsilon}_i^j \stackrel{iid}{\sim} \mathcal{N}(\mathbf{0}, \sigma^2 \mathbf{I})$ ,  $\sigma \in [0, 20]$
  - $\mathbf{x}_i^j = \mathbf{z}_i^j + \boldsymbol{\epsilon}_i^j$
4. Ball/Circle:  $K = 2$  items, where 1 item is uniformly distributed on the unit ball with gaussian error, and the second item is uniformly distributed on the unit sphere with gaussian error.
  - $\mathbf{z}_1^t \stackrel{iid}{\sim} \mathbb{B}(r = 1) + \mathcal{N}(\mathbf{0}, 0.1\mathbf{I})$  samples uniformly on unit ball of radius 2 with Gaussian error
  - $\mathbf{z}_2^t \stackrel{iid}{\sim} \mathbb{S}(r = 1.5) + \mathcal{N}(\mathbf{0}, 0.1\mathbf{I})$  samples uniformly on unit sphere of radius 2 with Gaussian error
  - $\boldsymbol{\epsilon}_i^j \stackrel{iid}{\sim} \mathcal{N}(\mathbf{0}, \sigma^2 \mathbf{I})$ ,  $\sigma \in [0, 10]$
  - $\mathbf{x}_i^j = \mathbf{z}_i^j + \boldsymbol{\epsilon}_i^j$
5. XOR:  $K = 2$  items, where:
  - $\mathbf{z}_1^t = \begin{cases} \mathbf{0} & t \in 1, \dots, 32 \\ \mathbf{1} & t \in 33, \dots, 64 \end{cases}$
  - $\mathbf{z}_2^t = \begin{cases} [0, 1]' & t \in 1, \dots, 32 \\ [1, 0]' & t \in 33, \dots, 64 \end{cases}$
  - $\boldsymbol{\epsilon}_i^j \stackrel{iid}{\sim} \mathcal{N}(\mathbf{0}, \sigma^2 \mathbf{I})$ ,  $\sigma \in [0, 0.8]$
  - $\mathbf{x}_i^j = \mathbf{z}_i^j + \boldsymbol{\epsilon}_i^j$

Bayes error was estimated by simulating  $n = 10,000$  points according to the above simulation settings, and approximating the Bayes error through numerical integration. The classification labels for  $K = 2$  simulations were consistent with the individual labels, and for the  $K = 16$ , the first class consists of the 8 distributions whose means were leftmost, and the rest of the distributions were the other class.

**D.2 Comparison Testing** Items are sampled with the same true distributions  $\mathbf{z}_i^j$  as before, with the following augmentation:

$$\mathbf{x}_{i,k}^j = \begin{cases} \mathbf{z}_i^j & k = 1 \\ \mathbf{z}_i^j + \boldsymbol{\epsilon}_i^j & k = 2 \end{cases}$$

That is, the observed data  $\mathbf{x}_{i,k}^j$  for item  $i$ , observation  $j$ , and sample  $k \in [2]$  is such that the first sample is distributed according to the true item distribution, and the second sample is distributed according to

the true item distribution with an added noise term, where  $\epsilon_i^j \stackrel{iid}{\sim} \mathcal{N}(\mathbf{0}, \sigma^2 \mathbf{I})$ :

1. No Signal:  $K = 2$   
 $\sigma \in [0, 10]$
2. Cross:  $K = 2$   
 $\sigma \in [0, 1]$
3. Gaussian:  $K = 16$   
 $\sigma \in [0, 1]$
4. Ball/Circle:  $K = 2$   
 $\sigma \in [0, 1]$
5. XOR:  $K = 2$   

$$\mathbf{x}_{i,k}^j = \begin{cases} \mathbf{z}_i^j + \boldsymbol{\tau}_i^j & k = 1 \\ \mathbf{z}_i^j + \boldsymbol{\tau}_i^j + \epsilon_i^j & k = 2 \end{cases} \text{ where } \boldsymbol{\tau}_i^j \stackrel{iid}{\sim} \mathcal{N}(\mathbf{0}, 0.1 \mathbf{I})$$
 $\sigma \in [0, 0.2]$

By construction, one would anticipate `Discr` of the first sample to exceed that of the second sample, as the second sample has additional error. Therefore, the natural hypothesis is:

$$H_0 : D^{(1)} = D^{(2)}, \quad H_A : D^{(1)} > D^{(2)}$$

## Appendix E. Hypothesis Testing.

**E.1 Goodness of Fit Test** Recall the goodness of fit test, shown in Equation (2.2). We approximate the distribution of  $\hat{S}$  under the null through a permutation approach. The item labels of our  $N$  samples are first permuted randomly, and  $\hat{S}_{0,N}$  is computed each time given the observed data  $\mathbf{X}$  and the permuted labels. For a level  $\alpha$  significance test, we compare  $\hat{S}$  to the  $(1 - \alpha)$  quantile  $Q_{1-\alpha}$  of the empirical null distribution  $\hat{D}_{0,N}$ , and reject the null hypothesis if  $\hat{D}_N < Q_{1-\alpha}$ . This approach provides a consistent and valid test under general assumptions.

Note that the permutation-based approach requires  $r$  computations of the sample `Discr`. The total computational complexity is then  $\mathcal{O}(N^2 \max(p, rs))$ . This approach is only linear in the number of desired repetitions, and therefore is sensible for most settings in which the sample `Discr` can itself be computed. Moreover, we can greatly speed this computation up through parallelization. With  $T$  cores, the computational complexity is instead  $\mathcal{O}(N^2 \max(p, \frac{r}{T}s))$ , as shown in Algorithm 1. We extend this goodness of fit test to both PICC and I2C2 to provide a robust  $p$ -value associated with both statistics of interest. Note that the permutation approach can be generalized to any statistic quantifying repeatability based on repeated measurements.

---

**Algorithm 1** **Discr Goodness of Fit Test.** Our implementation of the permutation test for the goodness of fit test of the hypothesis given in Equation (2.2) requires  $\mathcal{O}(N^2 \max(p, \frac{r}{T} s))$  time, where  $r$  is the number of permutations and  $T$  is the number of cores available for the permutation test. The `Shuffle` function is the function which rearranges all of the data within the dataset, without regard to item nor measurement index. The output provides a new measurement index for each item  $i$  and measurement  $j$ .

---

**Require:** (1)  $\{\mathbf{x}_i^j\}_{j \in [J_i], i \in [n]}$   $n$  items of data, each featuring  $J_i$  measurements.  
 (2)  $r$  an integer for the number of permutations.

**Ensure:**  $p \in [0, 1]$  the  $p$ -value associated with the test.

```

1: function  $p = \text{GOODNESSOFFITTEST}(\{\mathbf{x}_i^j\}_{j \in [J_i], i \in [n]}, r)$ 
2:    $d_a = \text{Discr}\{\mathbf{x}_i^j\}_{j \in [J_i], i \in [n]}$  ▷ compute observed sample Discr
   ▷ Note that this for-loop can be parallelized over  $T$  cores, as the loops are independent
3:   for  $i$  in  $1, \dots, r$  do
4:      $\pi = \text{Shuffle}(n, \{J_i\}_{i=1}^n)$  ▷ a random shuffling of the measurements
5:      $d_i = \text{Discr}\{\mathbf{x}_{\pi(i,j)}\}_{j \in [J_i], i \in [n]}$  ▷ Compute Discr with random order of sample ids
6:   end for
7:    $p = \frac{1}{r+1} (\sum_{i=1}^r \mathbb{I}_{\{d_a \geq d_i\}} + 1)$  ▷  $p$ -value is fraction of times observed is more extreme than under null
8:   return  $p$ 
9: end function

```

---



**E.2 Comparison Test** We implement Comparison testing using a permutation approach, similar to the goodness of fit test. First, compute the observed difference in `Discr` between two design choices. The null distribution of the difference in `Discr` is constructed by first taking random convex combinations of the observed data from each of the two methods choices (the "randomly combined datasets"). `Discr` is computed for each of the two randomly combined datasets for each permutation. Finally, for each permutation, the all pairs of observed differences in `Discr` is computed. Finally, the observed statistic is compared with the differences under the null of the randomly combined datasets. The p-value is the fraction of times that the observed statistic is more extreme than the null. Note that we can use this approach for both one and two-tailed hypotheses for an experimental design having higher `Discr`, lower `Discr`, and equal `Discr` relative a second approach; we implement all three in the software implementation of the comparison test. The Algorithm for the comparison test is shown in Algorithm 2, with the alternative hypothesis as specified in Equation (2.3). The computational complexity is then  $\mathcal{O}\left(\frac{r}{T}N^2 \max(p, \max_i(s_i))\right)$ . Note that for each permutation, the limiting step is the computation of the `Discr` in  $\mathcal{O}(N^2 \max(p, s))$ . This is then offset through parallelization over  $T$  cores in the implementation. We extend this comparison test to all competing approaches to provide a robust  $p$ -value associated with both statistics of interest, for similar reasons to the above. Again, this permutation approach can be generalized to any statistic quantifying repeatability based on repeated measurements.

**Algorithm 2** **DISCR Discriminability Comparison Test.** Our implementation of the permutation test for the hypothesis given in Equation (2.3) requires  $\mathcal{O}\left(\frac{r}{T}N^2 \max(p, s)\right)$  time, where  $r$  is the number of permutations and  $T$  is the number of cores available for the permutation test. Above, the only alternative considered is that  $H_A : D^{(1)} > D^{(2)}$ ; our code-based implementation provides strategies for  $H_A : D^{(1)} < D^{(2)}$  and  $H_A : D^{(1)} = D^{(2)}$  as well.

**Require:** (1)  $\{\mathbf{x}_i^j\}_{j \in [J_i], i \in [n]}$   $n$  items of data, each featuring  $J_i$  measurements, from the first sample.  
 (2)  $\{\mathbf{z}_i^j\}_{j \in [J_i], i \in [n]}$   $n$  the observed data, from the second sample.  
 (3)  $r$  an integer for the number of permutations.

**Ensure:**  $p \in [0, 1]$  the  $p$ -value associated with the test.

```

1: function  $p = \text{COMPARISONTEST}(\{\mathbf{x}_i^j\}_{j \in [J_i], i \in [n]}, \{\mathbf{z}_i^j\}_{j \in [J_i], i \in [n]}, r)$ 
2:    $\hat{D}^{(1)} = \text{DISCR}\{\mathbf{x}_i^j\}_{j \in [J_i], i \in [n]}$  ▷ The DISCR of the first sample.
3:    $\hat{D}^{(2)} = \text{DISCR}\{\mathbf{z}_i^j\}_{j \in [J_i], i \in [n]}$  ▷ The DISCR of the second sample.
4:    $d_a = \hat{D}^{(1)} - \hat{D}^{(2)}$  ▷ The observed difference in DISCR between samples 1 and 2.
5:   ▷ The for-loop below can be parallelized over  $T$  cores, as each loop is an independent
6:   for  $i$  in  $1 : r$  do
7:     ▷ Generate a synthetic null dataset for each of the 2 samples, using a convex combination
      of the elements of each sample
8:     for  $k$  in  $1 : 2$  do
9:        $\pi = \text{SHUFFLE}(n, \{J_i\}_{i=1}^n)$  ▷ a random shuffle of the measurements
10:       $\psi = \text{SHUFFLE}(n, \{J_i\}_{i=1}^n)$ 
11:       $\lambda_i^j \stackrel{iid}{\sim} \text{Unif}(0, 1)$  ▷ for  $j = 1, \dots, n$ , where  $\Lambda = (\lambda_j)_{j=1}^n$ 
12:       $\mathbf{u}_i^j = \lambda_i^j \mathbf{x}_{\pi(i,j)} + (1 - \lambda_i^j) \mathbf{z}_{\psi(i,j)}$  ▷ Convex combination of random elements from each
      sample
13:       $d_i^{(k)} = \text{DISCR}\{\mathbf{u}_i^j\}_{j \in [J_i], i \in [n]}$  ▷ Compute DISCR of the convexly combined elements
14:    end for
15:  end for
16:  ▷ Compute all pairs differences in DISCR using the convexly-combined samples
17:  for  $i$  in  $1, \dots, r - 1$  do
18:    for  $j$  in  $i + 1, \dots, r$  do
19:       $d_n \leftarrow c\left(d_n, d_{n,i}^{(1)} - d_{n,j}^{(2)}, d_{n,j}^{(2)} - d_{n,i}^{(1)}\right)$  ▷ Null distribution of the difference
20:    end for
21:  end for
22:  ▷  $p$ -value is fraction of times that observed DISCR is more extreme than synthetic datasets
23:   $p = \frac{2}{r(r-1)+1} \left( \sum_{i=1}^{\lfloor d_n \rfloor} \mathbb{I}_{\{d_a \leq d_{n,i}\}} + 1 \right)$ 
24:  return  $p$ 
25: end function

```

## Appendix F. Connectomics Application.

### F.1 Data Acquisition and Analysis

*fMRI Analysis Pipelines* The fMRI connectomes were acquired as follows. Motion correction is performed via `mcfliirt` to estimate the 6 motion parameters ( $x, y, z$  translation and rotations). Registration is performed by first performing a cross-modality registration from the functional to the anatomical

MRI using `fslirt-bbr`, followed by registration to the anatomical template using either (1) FSL-`fnirt` or (2) ANTs-`SyN`, two techniques for non-linear registration. Frequency filtering was performed by either (1) not frequency filtering, or (2) bandpass filtering signal outside of the  $[.01, .1]$  Hz range. Volumes were either (1) not scrubbed, or (2) scrubbed if motion exceeded 0.5 mm, in which case the preceding volume and succeeding two volumes were removed. Global signal regression was either (1) not performed, or (2) performed by removing the global mean signal across all voxels in the functional timeseries. Moreover, across all analysis pipelines, the top 5 principal components (`compcor`), Friston 24 parameters, and a quadratic polynomial were fit and regressed from the functional timeseries. Finally, the voxelwise timeseries were spatially downsampled using (1) the CC200 parcellation, (2) the AAL parcellation, (3) the Harvard-Oxford parcellation, or (4) the Desikan-Killany parcellation. Graphs were estimated by (1) computing the rank of the non-zero raw absolute correlations (zero-weight edges given a value of 0), (2) log-transforming the raw absolute correlations (the minimum value of the graph is down-scaled by a factor of 100 and then added to each edge to eliminate taking log of zero-weight edges), or (3) computing the raw absolute correlation between pairs of regions of interest in each parcellation. No mean centering was performed for functional connectivity estimates. Specific data analysis instructions for deployment in AWS can be found in the <https://neurodata.io/m2g>. All data analysis was performed in the AWS cloud using CPAC version 3.9.2 [41]. All parcellations are available in `neuroparc` human brain atlases [73].

**dMRI Analysis Pipelines** The dMRI connectomes were acquired as follows. The dMRI scans were corrected for eddy currents using FSL's `eddy-correct` [74]. FSL's "standard" linear registration pipeline was used to register the sMRI and dMRI images to the MNI152 atlas [74–77]. A tensor model is fit using DiPy [78] to obtain an estimated tensor at each voxel. A deterministic tractography algorithm is applied using DiPy's `EuDX` [78, 79] to obtain streamlines, which indicate the voxels connected by an axonal fiber tract. Graphs are formed by contracting voxels into graph vertices depending on spatial [80], anatomical [81–84], or functional [85–88] similarity. Given a parcellation with vertices  $V$  and a corresponding mapping  $P(v_i)$  indicating the voxels within a region  $i$ , we contract our fiber streamlines as follows.  $w(v_i, v_j) = \sum_{u \in P(v_i)} \sum_{w \in P(v_j)} \mathbb{I}\{F_{u,w}\}$  where  $F_{u,w}$  is true if a fiber tract exists between voxels  $u$  and  $w$ , and false if there is no fiber tract between voxels  $u$  and  $w$ . The specific parcellations leveraged are detailed in Kiar et al. [40], consisting of parcellations defined in the MNI152 space [81–88]. The graphs are then re-weighted using the aforementioned weighting schemes described in fMRI Analysis Pipelines Appendix F.1; namely, the raw, ranked, and log edge-weights. All parcellations are available in `neuroparc` human brain atlases [73].

**PCR RealSeqS Cancer Genomics Pipeline** The RealSeqS samples were acquired as follows. PCR was performed in 25  $\mu\text{L}$  reactions containing 7.25  $\mu\text{L}$  of water, 0.125  $\mu\text{L}$  of each primer, 12.5  $\mu\text{L}$  of NEBNext Ultra II Q5 Master Mix (New England Biolabs cat # M0544S), and 5  $\mu\text{L}$  of DNA. The cycling conditions were: one cycle of 98°C for 120 s, then 15 cycles of 98°C for 10 s, 57°C for 120 s, and 72°C for 120 s. Each plasma DNA sample was assessed in eight independent reactions, and the amount of DNA per reaction varied from 0.1  $\mu\text{g}$  to 0.25  $\mu\text{g}$ . A second round of PCR was then performed to add dual indexes (barcodes) to each PCR product prior to sequencing. The second round of PCR was performed in 25  $\mu\text{L}$  reactions containing 7.25  $\mu\text{L}$  of water, 0.125  $\mu\text{L}$  of each primer, 12.5  $\mu\text{L}$  of NEBNext Ultra II Q5 Master Mix (New England Biolabs cat # M0544S), and 5  $\mu\text{L}$  of DNA containing 5% of the PCR product from the first round. The cycling conditions were: one cycle of 98°C for 120 s, then 15 cycles of 98°C for 10 s, 65°C for 15 s, and 72°C for 120 s. Amplification products from the second round were purified with AMPure XP beads (Beckman cat # a63880), as per the manufacturer's instructions, prior to sequencing. As noted above, each sample was amplified in eight independent PCRs in the first round. Each of the eight independent PCRs was then re-amplified using index primers in the second PCR round. `Bowtie2` was then used to align reads to the human reference genome assembly GRC37 [89] for each well. After alignment to  $\sim 750,000$  amplicons, the wells were

downsampled into non-overlapping windows of  $5 \times 10^4$  bases,  $5 \times 10^5$  bases,  $5 \times 10^6$  bases, or to the individual chromosome level (the resolution of the data).

**F.2 Effect Size Investigation** In this investigation, we are interested in learning how maximization based on the observed notion of reliability correlates with real performance on a downstream inference task. Recalling Corollary (3), we explore the implications of this corollary in a large neuroimaging dataset provided by the Consortium for Reliability and Reproducibility [27], and demonstrate that selection of the experimental design via `Discr`, in fact, facilitates improved downstream inference on both a regression and classification task. We further extend this to two separate genomics datasets investigating classification tasks, and again demonstrate that selection of experimental design via `Discr` improves downstream inference. This provides strong motivation for leveraging the `Discr` for experimental design.

Ideally, for a particular summary reference statistic, a high value will generally correlate with a positive effect size. For datasets  $i = 1, \dots, M$  where  $M$  is the total number of datasets, an analysis strategy  $j = 1, \dots, 192$  for 192 total analysis strategies, and  $k = 1, \dots, 3$  are our summary reference statistics of interest (`Discr`, `PICC`, `Fingerprint`, `I2C2`, `Kernel`), we fit the standard linear regression model  $Y = \beta X + \epsilon$ , where we model the effect size  $Y$  estimated by `DCorr` [90] via a linear relationship with  $X$ , the observed reference statistic for approach  $k$ , with coefficient  $\beta$ . Note that the interpretation of  $\beta$  is the expected change in the effect size  $Y$  due to a single unit change in the observed reference statistic  $X$ . Both  $Y$  and  $X$  are uniformly normalized across all strategies within a single dataset to facilitate intuitive comparison across methods. For each reference statistic  $k$ , we pose the following hypothesis:

$$H_0 : \beta = 0; \quad H_A : \beta > 0$$

Acceptance of the alternative hypothesis would have the interpretation that an increase in the observed reference statistic  $X$  would tend to correspond to an increase in the observed effect size  $Y$ , and the relevant test is the one-way  $Z$ -test. To robustify against model assumptions, we use robust standard errors [46]. Acceptance of the alternative hypothesis against the null provides evidence that an increase in the sample statistic corresponds to an increase in the observed effect size, where the responses (age, sex, cancer status) were not considered at the time the data were analyzed nor when the reference statistics computed. This provides evidence that the statistic is informative for experimental design within the context of this investigation. Model fitting for this investigation is conducted using the `lm` package in the R programming language [91].

### F.3 Human Brain Imaging Dataset Descriptions

*Useful Data Links* All relevant analysis scripts and data for figure reproduction in this manuscript made publicly available, and can be found at <https://neurodata.io/mgc>.

| Dataset | Manuf.  | Model   | TE (ms) | TR (ms)  | STC    | #Timepts | #Sub | #Ses | #Scans | Discr |
|---------|---------|---------|---------|----------|--------|----------|------|------|--------|-------|
| KKI2009 | NA      | NA      | NA      | NA       | NA     | NA       | 21   | 1    | 42     | 0.93  |
| NKI24   | Siemens | TrioTim | 30      | 645      | inter. | 900      | 24   | 2    | 47     | 0.98  |
| BNU1    | Siemens | TrioTim | 30      | 2000     | inter. | 200      | 50   | 2    | 100    | 0.97  |
| BNU2    | Siemens | TrioTim | 30      | variable | inter. | variable | 50   | 2    | 100    | 0.92  |
| DC1     | Philips | NaN     | 35      | 2500     | inter. | 120      | 114  | 4    | 244    | 0.95  |
| HNU1    | GE      | MR750   | 30      | 2000     | inter. | 300      | 30   | 10   | 300    | 0.98  |
| IACAS   | GE      | Signa   | 30      | 2000     | inter. | 240      | 28   | 3    | 59     | 0.83  |
| IBATRT  | Siemens | TrioTim | 30      | 1750     | seq.   | 220      | 36   | 2    | 50     | 0.95  |
| IPCAS   | NA      | NA      | NA      | NA       | NA     | NA       | 78   | 2    | 156    | 0.99  |
| IPCAS1  | Siemens | TrioTim | 30      | 2000     | inter. | 205      | 30   | 2    | 60     | 1.00  |
| IPCAS2  | Siemens | TrioTim | 30      | 2500     | inter. | 212      | 35   | 2    | 70     | 0.98  |
| IPCAS5  | Siemens | TrioTim | 30      | 2000     | inter. | 170      | 22   | 2    | 44     | 0.96  |
| IPCAS6  | Siemens | TrioTim | 30      | 2500     | inter. | 242      | 2    | 15   | 30     | 1.00  |
| IPCAS8  | Siemens | TrioTim | 30      | 2000     | inter. | 240      | 13   | 2    | 26     | 0.96  |
| JHNU    | Siemens | TrioTim | 30      | 2000     | inter. | 250      | 30   | 2    | 60     | 0.96  |
| LMU3    | Siemens | TrioTim | 30      | 3000     | inter. | 120      | 25   | 2    | 50     | 0.93  |
| MRN1    | NA      | NA      | NA      | NA       | NA     | NA       | 53   | 2    | 88     | 0.94  |
| NYU1    | Siemens | Allegra | 25      | 2000     | NaN    | 197      | 25   | 3    | 75     | 0.98  |
| NYU2    | Siemens | Allegra | 15      | 2000     | inter. | 180      | 187  | 3    | 252    | 0.96  |
| SWU1    | Siemens | TrioTim | 30      | 2000     | inter. | 240      | 20   | 3    | 59     | 0.97  |
| SWU2    | Siemens | TrioTim | 30      | 2000     | inter. | 300      | 27   | 2    | 54     | 0.96  |
| SWU3    | Siemens | TrioTim | 30      | 2000     | inter. | 242      | 24   | 2    | 48     | 0.98  |
| SWU4    | Siemens | TrioTim | 30      | 2000     | inter. | 242      | 235  | 2    | 467    | 0.97  |
| UM      | Siemens | TrioTim | 30      | 2000     | seq.   | 150      | 80   | 2    | 160    | 0.99  |
| UPSM1   | Siemens | TrioTim | 29      | 1500     | seq.   | 200      | 100  | 3    | 230    | 0.89  |
| Utah1   | Siemens | TrioTim | 28      | 2000     | inter. | 240      | 26   | 2    | 52     | 0.92  |
| UWM     | GE      | MR750   | 25      | 2600     | inter. | 231      | 25   | 2    | 50     | 0.96  |
| XHCUMS  | Siemens | TrioTim | 30      | 3000     | inter. | 124      | 24   | 5    | 120    | 0.91  |

Figure 6: **fMRI Dataset Descriptions.** In the above table, STC corresponds to slice timing correction. Rows with NA entries do not have available metadata associated with the scanning protocol. The sample stabilities correspond to the *Discr* of the best performing pipeline overall, FNNNCP.

| Dataset | Manuf.  | Model   | TE (ms) | TR (ms) | #Dir | bval $\frac{s}{mm^2}$ | #Sub | #Ses | #Scans | Discr |
|---------|---------|---------|---------|---------|------|-----------------------|------|------|--------|-------|
| BNU1    | Siemens | TrioTim | 89      | 8000    | 30   | 1000                  | 57   | 2    | 113    | 1.00  |
| HNU1    | GE      | MR750   | Min     | 8600    | 33   | 1000                  | 30   | 10   | 300    | 0.99  |
| KKI2009 | NA      | NA      | NA      | NA      | NA   | NA                    | 21   | 2    | 42     | 1.00  |
| NKI24   | Siemens | TrioTim | 95      | 2400    | 137  | 1500                  | 20   | 2    | 40     | 1.00  |
| SWU4    | Siemens | TrioTim | NaN     | NaN     | 93   | 1000                  | 227  | 2    | 454    | 0.88  |

Figure 7: **dmRI Dataset Descriptions.** In the above table, #Dir corresponds to the number of diffusion directions. Rows with NA entries do not have available metadata associated with the scanning protocol. The sample stabilities correspond to the *Discr* of the pipeline with the CPAC200 parcellation and the log-transformed edges.
